# Supplementary material for: Annual net CO 2 fluxes from drained organic soils used for agriculture in the hemiboreal region of Europe
Source: Copernicus journal article supplement (doi:10.5194/egusphere-2024-2523), 2024-09-05
Supplement: Supplementary file [file egusphere-2024-2523-RC1-supplement.pdf]

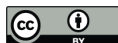

## Annual net CO<sub>2</sub> fluxes from drained organic soils used for agriculture in the hemiboreal region of Europe

Arta Bārdule<sup>1</sup>, Raija Laiho<sup>2</sup>, Jyrki Jauhiainen<sup>2</sup>, Kaido Soosaar<sup>3</sup>, Andis Lazdiņš<sup>1</sup>, Kęstutis Armolaitis<sup>4</sup>, Aldis Butlers<sup>1</sup>, Dovilė Čiuldienė<sup>4</sup>, Andreas Haberl<sup>5</sup>, Ain Kull<sup>3</sup>, Milda Muraškienė<sup>4</sup>, Ivika Ostonen<sup>3</sup>,  
5 Gristin Rohula-Okunev<sup>3</sup>, Muhammad Kamil-Sardar<sup>3</sup>, Thomas Schindler<sup>3</sup>, Hanna Vahter<sup>3</sup>, Egidijus Vigrिकास<sup>4</sup>, Ieva Līcīte<sup>1</sup>

<sup>1</sup>Latvian State Forest Research Institute "Silava", Salaspils, LV-2169, Latvia

<sup>2</sup>Natural Resources Institute Finland (Luke), Helsinki, P.O. Box 2, 00791, Finland

<sup>3</sup>Department of Geography, University of Tartu, Tartu, 51014, Estonia

10 <sup>4</sup>Department of Silviculture and Ecology, Lithuanian Research Centre for Agriculture and Forestry, Kėdainiai distr., 58344, Lithuania

<sup>5</sup>Michael Succow Foundation, partner in the Greifswald Mire Centre, Greifswald, 17489, Germany

*Correspondence to:* Arta Bārdule (arta.bardule@silava.lv)

**Abstract.** Carbon dioxide (CO<sub>2</sub>) emissions from drained organic soils used for agriculture contribute significantly to the overall  
15 anthropogenic greenhouse gas budget in land use, land-use change and forestry (LULUCF) sector. To justify the implementation of climate change mitigation measures on these lands, it is important to estimate at least the regional variation in annual net CO<sub>2</sub> fluxes. This study presents the first estimates of annual net CO<sub>2</sub> fluxes from drained nutrient-rich organic soils in cropland (8 sites) and grassland (12 sites) in the hemiboreal region of Europe, represented by Estonia, Latvia and Lithuania. The study sites represented both deep, and shallow highly decomposed, organic soils, categorized based on the  
20 concentration of organic carbon in the top 20-cm soil layer. In each site, CO<sub>2</sub> flux measurements were conducted at least over two years. To estimate annual net CO<sub>2</sub> fluxes, ecosystem respiration ( $R_{\text{eco}}$ ) and soil heterotrophic respiration ( $R_{\text{het}}$ ) were measured using a manual chamber technique, and carbon (C) input to soil through plant residues was estimated.  $R_{\text{eco}}$  was strongly dependent on temperature, particularly soil temperature at 10 cm depth, but rather independent of soil water-table level and soil moisture. The overall mean annual net CO<sub>2</sub> fluxes, calculated as the difference between annual CO<sub>2</sub> output ( $R_{\text{het}}$ )  
25 and annual C input (plant residues), was  $4.8 \pm 0.8$  t CO<sub>2</sub>-C ha<sup>-1</sup> yr<sup>-1</sup> in cropland and  $3.8 \pm 0.7$  t CO<sub>2</sub>-C ha<sup>-1</sup> yr<sup>-1</sup> in grassland, while the means for “true” or deep organic soil were  $4.1 \pm 0.7$  t CO<sub>2</sub>-C ha<sup>-1</sup> yr<sup>-1</sup> in cropland and  $3.2 \pm 0.6$  t CO<sub>2</sub>-C ha<sup>-1</sup> yr<sup>-1</sup> in grassland. Both the annual  $R_{\text{eco}}$  and net CO<sub>2</sub> fluxes for shallow highly decomposed organic soils, currently not recognized as organic soil by the Intergovernmental Panel on Climate Change (IPCC), were of similar magnitude or even higher than those from deep organic soil, suggesting a need to separate them from mineral soils in emission estimation.



## 30 **1 Introduction**

Organic soils drained for agriculture contribute significantly to anthropogenic greenhouse gas (GHG) emissions and are carbon dioxide (CO<sub>2</sub>) emission hotspots in the agricultural and land use, land-use change and forestry (LULUCF) sectors in many countries (Tubiello et al., 2015; Tiemeyer et al., 2016; Tubiello et al., 2016; Säurich et al., 2019a; European Environment Agency, 2023a). When evaluating the overall impact of drained organic soils used for agricultural production on the  
35 greenhouse effect, CO<sub>2</sub> is considered the most important GHG (Houghton et al., 2001; Maljanen et al., 2007). Maljanen et al. (2007) reported that CO<sub>2</sub> emissions accounted for around 80 % of the total emissions of CO<sub>2</sub>, methane (CH<sub>4</sub>), and nitrous oxide (N<sub>2</sub>O) in drained organic croplands soils in the boreal region. The soil CO<sub>2</sub> emissions result from two main processes: autotrophic respiration, which is the respiration of living plant roots, and heterotrophic respiration (R<sub>het</sub>), which involves soil biota such as microorganisms responsible for decomposing litter and soil organic matter (SOM) (Kuzyakov, 2006; Berglund  
40 et al., 2011; Bader et al., 2017; Tang et al., 2020a; Tang et al., 2020b). SOM-derived CO<sub>2</sub> emissions, along with estimates of C input to soil by vegetation, are key components in the assessment of soil as a source or sink of atmospheric CO<sub>2</sub> (Kuzyakov, 2006; Tiemeyer et al., 2016).

According to the European Union (EU) GHG inventory for the year 2021, 4.1 Mha or 1 % of the total land area in the EU comprised managed organic soils under cropland and grassland, corresponding to emissions of 76 Mt of CO<sub>2</sub> (European  
45 Environment Agency, 2023a). Thus, these soils are responsible for the largest share (~70 %) of GHG emissions from managed organic soils in the EU (European Environment Agency, 2024). The largest area of drained organic soils used for agriculture is in Eastern and Northern Europe. As of 2019, this region comprised 45 % of the worldwide agricultural land (FAO, 2020). In order to achieve the international climate change mitigation goals, like the Paris Agreement (UNFCCC, 2015) and the European Green Deal (Fetting, 2020), an increase in the sequestration of atmospheric CO<sub>2</sub> and a reduction in GHG emissions  
50 from organic soils, especially from soils drained for agricultural use, is urgently required. For effective mitigation actions, it needs to be known where and why the emissions are highest, and how they respond to changes in factors regulating them.

It is well documented that improved soil aeration caused by lowering the soil water-table level (WTL) through ditch drainage, and mechanical disturbance (e.g., repeated ploughing) as well as liming and fertilization, improve conditions for SOM mineralization and the associated CO<sub>2</sub> production (Nykänen et al., 1995; Lohila et al., 2004; Maljanen et al., 2007). However,  
55 CO<sub>2</sub> emissions from drained organic soils vary considerably. They depend on complex interactions of many physical and chemical factors, including local climate and physical soil conditions (mainly soil temperature, moisture, and WTL), soil properties (e.g., peat type, composition, degree of decomposition), as well as the type and intensity of management, including the type of vegetation (Oleszczuk et al., 2008; Norberg et al., 2016; Tiemeyer et al., 2016; Minasny et al., 2017; Bader et al., 2018; Fairbairn et al., 2023).

60 Relative to the number of the factors in effect and their potential interactions, as well as variation in management practices and intensity, there is still comprehensive information on the annual net CO<sub>2</sub> fluxes from drained organic soils used for agriculture from a rather limited number of sites. For instance, the IPCC (Hiraishi et al., 2014) default CO<sub>2</sub> emission factors for drained



nutrient-rich organic soils in the temperate and boreal regions are based on data from 39 sites for croplands and 60 sites for grasslands. The categories temperate and boreal are broad and comprise a lot of variation in climatic, hydrological and geomorphological conditions that are likely to shape the emissions, but currently there is too little data to adjust the emission factors correspondingly. Further, many of the GHG emission studies have focused on deep peat soils known as Histosols, which have high soil organic carbon (SOC) content. Only few studies have highlighted the important contribution of organic soils with comparatively low SOC concentration (<15.0 %, Tiemeyer et al., 2016), and even soils not falling under the definition of organic soils provided by the IPCC (Eggleston et al., 2006), to total GHG emissions (Leiber-Sauheitl et al., 2014; Eickenscheidt et al., 2015; Liang et al., 2024). These soils include formerly drained peatlands undergoing transformation into organo-mineral soils due to prolonged agricultural activities. Thus, the total GHG emissions from soils used in agriculture may be underestimated if such soils are treated as mineral soils in the estimation, but their emissions are actually higher.

In the Baltic states, which, according to the vegetation classification (Ahti et al., 1968), fall within the hemiboreal region of Europe, the share of croplands and grasslands with organic soils comprises 3–6 % and 5–19 % of the total land area and correspond to emissions of up to 156 % and 75 % of total net GHG emissions in cropland and grassland, respectively (Estonia's National GHG inventory, 2023; Latvia's National GHG inventory, 2023; Lithuania's National GHG inventory, 2023). To provide knowledge-based recommendations for land-use and climate policymakers regarding the management of organic soils, the magnitude of ecosystem CO<sub>2</sub> fluxes and the factors affecting them need to be quantified under climatic and management conditions that are relevant nationally or at least regionally (Wüst-Galley et al., 2020). In the hemiboreal region of Europe that falls between the boreal and temperate regions, region-specific CO<sub>2</sub> emission factors for cropland and grassland with drained organic soils have not been elaborated so far, due to insufficient data availability.

The primary aims of this study were to produce the first estimates on annual net CO<sub>2</sub> fluxes from drained organic soils in cropland and grassland in the Baltic states, and to elaborate corresponding CO<sub>2</sub> emission factors for this hemiboreal region of Europe. In addition, we evaluated the impacts of organic carbon (OC) concentration in topsoil and other potentially controlling environmental variables on the magnitude of the CO<sub>2</sub> fluxes. The study was conducted at 20 study sites covering managed grasslands and croplands with both deep, and shallow highly decomposed, organic soils, grouped depending on the OC concentration in the topsoil layer.

## 2 Material and methods

### 2.1 Study sites

The study was conducted in Estonia, Latvia and Lithuania, which are part of the hemiboreal vegetation region of Europe. In total, 20 study sites were included in the study (Fig. 1, Table 1, Table S1): 8 sites in cropland (arable land) and 12 sites in grassland with low management intensity (grazing or fodder production that involves up to two grass cuttings per year). The

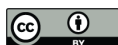

105 sites, established on formerly drained peatlands, included both i) deep organic soils with an OC concentration above 12 % in the 0–20 cm soil layer, and ii) shallow highly decomposed organic soils with an OC concentration below 12 % in the 0–20 cm soil layer. The latter type of soil, in the current classification, does not meet the IPCC criterion for organic soils (Eggleston et al., 2006). The thickness of the soil organic layer ranged from 16 to 72 cm (mean  $43 \pm \text{S.E. } 7$  cm) in cropland and from 17 to 95 cm ( $46 \pm 7$  cm) in grassland (Table 1). All cropland sites were deep drained (mean WTL > 30 cm) according to the IPCC (Hiraishi et al., 2014), while the grassland sites included both deep drained ( $n = 10$ ) and shallow drained (mean WTL < 30 cm,  $n = 2$ ) sites (Table 1, Fig. S1). Description of the vegetation species composition in the grassland sites is summarized in Table S2. All study sites represented a steady-state level of land use, i.e., the land had been used for agricultural production for at least the past 20 years. The long-term average (1991–2020) annual air temperature was 6.3 °C in Estonia, 6.9 °C in Latvia, 7.4 °C in Lithuania, while the average annual precipitation was 665 mm in Estonia, 681 mm in Latvia and 679 mm in Lithuania (Climate Change Knowledge Portal, 2023).

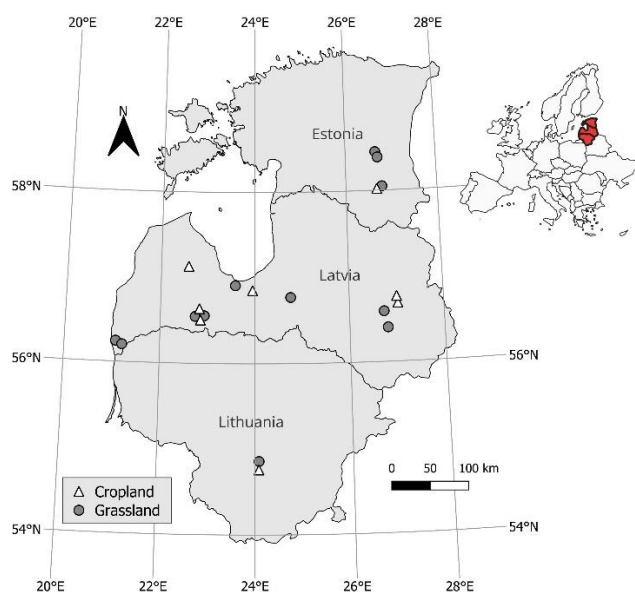

105 **Figure 1. Location of the study sites in the Baltic States (Estonia, Latvia and Lithuania) belonging to the hemiboreal vegetation region of Europe (maps prepared using QGIS 3.34.4).**

**Table 1. Description of the study sites with drained nutrient-rich organic soil in agricultural land in the Baltic States.**

| Land use type | Country | Study site (name, identification code)* | Soil group (WRB, 2014) | Management during the study period (type of cultivated arable crop/perennial grass, tillage, N input with fertilization) | Mean thickness of organic soil layer (range), cm | Mean soil water-table level $\pm$ S.E. (range), cm below the surface |
|---------------|---------|-----------------------------------------|------------------------|--------------------------------------------------------------------------------------------------------------------------|--------------------------------------------------|----------------------------------------------------------------------|
| Cropland      | Latvia  | Diervanīne I, CL_LV_1 <sup>D</sup>      | Histosols              | Winter wheat; annual tillage; N input 120 kg N ha <sup>-1</sup> yr <sup>-1</sup>                                         | 55                                               | 87.3 $\pm$ 3.9 (12–155)                                              |

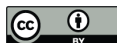

| Land use type | Country                          | Study site (name, identification code)* | Soil group (WRB, 2014)                            | Management during the study period (type of cultivated arable crop/perennial grass, tillage, N input with fertilization) | Mean thickness of organic soil layer (range), cm  | Mean soil water-table level $\pm$ S.E. (range), cm below the surface |                         |
|---------------|----------------------------------|-----------------------------------------|---------------------------------------------------|--------------------------------------------------------------------------------------------------------------------------|---------------------------------------------------|----------------------------------------------------------------------|-------------------------|
| Grassland     |                                  | Diervanīne II, CL LV 2 <sup>D</sup>     | Histosols                                         | Maize; annual tillage; N input 120 kg N ha <sup>-1</sup> yr <sup>-1</sup>                                                | 57                                                | 96.2 $\pm$ 2.8 (53–160)                                              |                         |
|               |                                  | Gavenpurvs, CL LV 3 <sup>D</sup>        | Histosols                                         | Winter wheat; annual tillage; N input 120 kg N ha <sup>-1</sup> yr <sup>-1</sup>                                         | 45                                                | 41.7 $\pm$ 3.3 (-3–93)                                               |                         |
|               |                                  | Mārupe, CL LV 4 <sup>D</sup>            | Histosols                                         | Maize; annual tillage; N input 120 kg N ha <sup>-1</sup> yr <sup>-1</sup>                                                | 72                                                | 86.3 $\pm$ 2.3 (33–140)                                              |                         |
|               |                                  | Lazdiņi I, CL LV 5 <sup>S</sup>         | Gleysols                                          | Winter wheat, winter rape; annual tillage; N input 189 kg N ha <sup>-1</sup> yr <sup>-1</sup>                            | 18 (15–20)                                        | 59.1 $\pm$ 1.3 (30–100)                                              |                         |
|               |                                  | Lazdiņi II, CL LV 6 <sup>S</sup>        | Gleysols                                          | Beans; annual tillage; no information on N input                                                                         | 16 (10–21)                                        | 54.7 $\pm$ 3.4 (1–91)                                                |                         |
|               | Estonia                          | Saverna I, CL EE 1 <sup>D</sup>         | Histosols                                         | Maize; annual tillage; no information on N input                                                                         | 33 (30–40)                                        | 46.7 $\pm$ 0.9 (29–78)                                               |                         |
|               | Lithuania                        | Dobilija, CL LT 1 <sup>D</sup>          | Histosols                                         | Winter wheat, spring wheat, winter rape; no-tillage > 5 years; N input 188 kg N ha <sup>-1</sup> yr <sup>-1</sup>        | 45 (45–45)                                        | > 150 (110–>150)                                                     |                         |
|               | Latvia                           |                                         | Kašķu, GL LV 1 <sup>D</sup>                       | Histosols                                                                                                                | Perennial grass (managed); no-tillage; no N input | 42                                                                   | 91.1 $\pm$ 3.3 (1–150)  |
|               |                                  |                                         | Krista, GL LV 2 <sup>D</sup>                      | Histosols                                                                                                                | Perennial grass (managed); no-tillage; no N input | 50                                                                   | 25.5 $\pm$ 2.9 (-2–98)  |
|               |                                  |                                         | Stabulnieku, GL LV 3 <sup>D</sup>                 | Histosols                                                                                                                | Perennial grass (managed); no-tillage; no N input | 50                                                                   | 42.2 $\pm$ 3.1 (-4–110) |
|               |                                  |                                         | Rucava, GL LV 4 <sup>D</sup>                      | Gleysols                                                                                                                 | Perennial grass (managed); no-tillage; no N input | 31 (30–32)                                                           | 30.3 $\pm$ 2.7 (-3–91)  |
|               |                                  |                                         | Lazdiņi III, GL LV 5 <sup>S</sup>                 | Gleysols                                                                                                                 | Perennial grass (managed); no-tillage; no N input | 28 (20–35)                                                           | 47.7 $\pm$ 2.1 (1–85)   |
|               |                                  |                                         | Andrupēni, GL LV 6 <sup>S</sup>                   | Phaeozems                                                                                                                | Perennial grass (managed); no-tillage; no N input | 22 (15–30)                                                           | 94.2 $\pm$ 1.5 (47–127) |
|               |                                  |                                         | Lazdiņi IV, GL LV 7 <sup>D</sup>                  | Phaeozems                                                                                                                | Perennial grass (managed); no-tillage; no N input | 43 (20–70)                                                           | 46.3 $\pm$ 2.1 (0–125)  |
|               |                                  |                                         | Ķegums, GL LV 8 <sup>S</sup>                      | Umbrisols                                                                                                                | Perennial grass (managed); no-tillage; no N input | 17 (10–25)                                                           | 83.0 $\pm$ 2.3 (0–146)  |
| Estonia       |                                  | Maramaa I, GL EE 1 <sup>D</sup>         | Histosols                                         | Perennial grass (managed); no-tillage; no N input                                                                        | 37 (30–40)                                        | 22.6 $\pm$ 0.9 (-3–51)                                               |                         |
|               |                                  | Saverna II, GL EE 2 <sup>D</sup>        | Histosols                                         | Perennial grass (managed); no-tillage; no N input                                                                        | 47 (40–50)                                        | 58.4 $\pm$ 1.0 (32–84)                                               |                         |
|               | Maramaa II, GL EE 3 <sup>D</sup> | Histosols                               | Perennial grass (managed); no-tillage; no N input | 92 (75–100)                                                                                                              | 30.6 $\pm$ 1.4 (-1–96)                            |                                                                      |                         |
| Lithuania     | Dubrava, GL LT 1 <sup>D</sup>    | Histosols                               | Perennial grass (managed); no-tillage; no N input | 95 (78–120)                                                                                                              | 43.3 $\pm$ 3.7 (-3–150)                           |                                                                      |                         |

110

\* Sites characterized as 'deep organic soils' are marked with upper index D, while sites characterized as 'shallow highly decomposed organic soils' are marked with upper index S.



## 2.2 Measurements of ecosystem respiration

To estimate ecosystem respiration ( $R_{eco}$ ), which includes both soil heterotrophic ( $R_{het}$ ) respiration from organic matter decomposition and autotrophic respiration of above- and belowground plant biomass, gas sampling was conducted once or twice a month (Table S1). The measurement periods varied between sites as shown in Table S1, falling between December 2016 and June 2023. One to five plots per site (Table S1) were prepared for gas sampling by installing permanent circular collars (area 0.1995 m<sup>2</sup>) in the soil, extending down to five-cm depth, at least one month before the first gas sampling to avoid the disturbance to the vegetation affecting the results. Gas sampling was conducted using manually-operated closed static opaque chambers (volume 0.0655 m<sup>3</sup>). The chambers were positioned air-tightly on the collars and during the next 30- (Latvia, Lithuania) or 60-minute (Estonia) period, four consecutive gas samples (100 cm<sup>3</sup>) were taken in 10- (Latvia, Lithuania) or 20-minute (Estonia) intervals, respectively, using underpressurized (0.3 mbar) glass vials. All measurements were made during daytime, randomizing the time of measurement events among sites and plots.

The CO<sub>2</sub> concentration in the  $R_{eco}$  gas samples was determined using a gas chromatograph (GC) method. The gas samples were analyzed using Shimadzu GC-2014 equipped with ECD detector (Shimadzu Corporation, Kyoto, Japan) at the Laboratory of the Geography Department, University of Tartu (Estonia) and Shimadzu Nexis GC-230 equipped with ECD detectors (Shimadzu USA manufacturing, Inc., Canby, OR, USA) and LabSolutions software 5.93 at the Latvian State Forest Research Institute Silava (LVS EN ISO 17025:2018-accredited laboratory, Latvia). The uncertainty of the method was estimated to be 20 ppm of CO<sub>2</sub>.

## 2.3 Flux calculations and data quality check

Quality control of the data (GC results) involved assessment of the fit of the CO<sub>2</sub> concentrations in the gas samples to a linear regression representing the gas concentration change in time in the closed chamber. Data were excluded from further data processing if the coefficient of determination ( $R^2$ ) of the regression was lower than 0.9 except when the difference between the maximum and minimum CO<sub>2</sub> concentration in the four consecutive gas samples of a measurement event was lower than the uncertainty of the CG method.

Instantaneous  $R_{eco}$  was calculated based on the equation of Ideal gas law using the slope of the linear regression describing the change in the CO<sub>2</sub> concentration over time following Eq. (1):

$$R_{eco} = \frac{M \times P \times V \times Slope}{R \times T \times A \times 1000}, \quad (1)$$

where  $R_{eco}$  is instantaneous ecosystem respiration (mg CO<sub>2</sub>-C m<sup>-2</sup> h<sup>-1</sup>), M is the molar mass of CO<sub>2</sub>-C (12.01 g mol<sup>-1</sup>), P is air pressure in the chamber during sampling (assumption) (101 300 Pa), V is chamber volume (0.0655 m<sup>3</sup>); Slope is the slope of the constructed linear regression describing the change in CO<sub>2</sub> concentration over time (ppm h<sup>-1</sup>), R is the universal gas constant (8.314 m<sup>3</sup> Pa K<sup>-1</sup> mol<sup>-1</sup>), T is air temperature (K), and A is collar area (0.1995 m<sup>2</sup>).



## 2.4 Measurements of soil heterotrophic respiration

On 13 study sites (four croplands and nine grasslands), soil heterotrophic respiration ( $R_{\text{het}}$ ) was measured to allow comparison  
145 between the use of direct  $R_{\text{het}}$  measurements versus  $R_{\text{het}}$  estimates derived from  $R_{\text{eco}}$  measurements in estimation of annual net  
CO<sub>2</sub> fluxes. Three measurement points per plot (i.e., nine measurement points per study site, Table S1) with an area of 0.36  
m<sup>2</sup> were established in the previous growing season prior the measurements of soil heterotrophic respiration ( $R_{\text{het}}$ ) were started.  
Vegetation was removed, soil trenching to a depth of at least 40 cm was done to exclude existing roots, and a geotextile was  
installed to prevent new root ingrowth into the measurement points. Soil  $R_{\text{het}}$  was measured once or twice a month during the  
150 vegetation periods (April–November) (Table S1) using a CO<sub>2</sub> gas analyzer (EGM-5, P.P. Systems, Amesbury, MA, USA) and  
opaque fan-equipped chambers with a volume of 0.017 or 0.023 m<sup>3</sup>.  $R_{\text{het}}$  measurements were conducted by positioning a  
chamber (area 0.07 m<sup>2</sup>) open lower edge air-tightly on bare soil without a collar.

The duration of each  $R_{\text{het}}$  measurement was 180 seconds, during which the CO<sub>2</sub> concentration in the closed chamber was  
recorded every second. Measurement results (CO<sub>2</sub> concentration, ppm) were used to construct linear regressions reflecting  
155 changes in CO<sub>2</sub> concentration over time. To avoid possible disturbance from chamber positioning, concentration values  
obtained during the first 15 and the last 30 seconds of the measurement period (180 seconds in total) were excluded from the  
regression. Similarly to  $R_{\text{eco}}$ , instantaneous  $R_{\text{het}}$  was calculated based on the equation of Ideal gas law using the slope of the  
constructed linear regression (Eq. (1)).

## 2.5 Estimation of C stock in above- and belowground parts of vegetation

160 To estimate the vegetation C stocks, above- and belowground plant biomass was sampled in each plot with at least three  
replicates, once to thrice per study period. The biomass sampling dates for each study site are summarized in Table S1. The  
sampling areas (1 m distance between replicates) were representative for each the  $R_{\text{eco}}$  measurement plot avoiding atypical  
microrelief and disturbance of vegetation in CO<sub>2</sub> flux measurement points (permanent circular collars). The sampling area of  
aboveground biomass was 625 cm<sup>2</sup> in Latvia, 1600 cm<sup>2</sup> in Lithuania, and 10000 cm<sup>2</sup> in Estonia, and the sampling area of  
165 belowground biomass was 625 cm<sup>2</sup> in Latvia, 1600 cm<sup>2</sup> in Lithuania, and 15 soil cores (diameter 48 mm) were randomly  
sampled per each site in Estonia. The belowground part was sampled by excavating roots down to 20–30 cm depth. Vegetation  
samples were transported to the laboratory, and their dry mass was determined after drying at 65–70°C temperature for 48 h  
or till a constant mass was reached. Before drying, the samples of belowground biomass were cleaned of soil particles by  
washing with cold tap water and using wet sieving. Total C and nitrogen (N) concentrations in all biomass samples were  
170 determined with the elementary analysis method (elemental analyzer Elementar El Cube) according to the LVS ISO  
10694:2006 and LVS ISO 13878:1998, respectively.



## 2.6 Soil sampling and analyses

At each plot, soil was sampled in one to three replicates using a soil sample probe from the following depths: 0–10 cm, 10–20 cm, 20–30 cm, 30–40 cm, 40–50 cm, 50–75 cm, and 75–100 cm. The soil samples were first pretreated for physico-chemical analyses including drying at temperature not exceeding 40 °C and sieving (aperture size of 2 mm) according to the LVS ISO 11464:2005. The following soil variables were then determined: soil pH according to LVS EN ISO 10390:2021 (suspension of soil in 1 mol L<sup>-1</sup> potassium chloride (KCl) solution, pH KCl; pH-meter Adrona AM 1605); total C (TC) and total N (TN) concentrations by dry combustion according to the LVS ISO 10694:2006 and LVS ISO 13878:1998 (elemental analyzer Elementar El Cube); carbonate concentration using a digital soil calcimeter UGT/BD Inventions FOG II Calcimeter Field Kit; ash content according to the LVS EN ISO 18122:2022; and concentrations of HNO<sub>3</sub>-extractable potassium (K), calcium (Ca), magnesium (Mg) and phosphorus (P) according to the LVS EN ISO 11885:2009 with the inductively coupled plasma-optical emission spectrometry (ICP-OES) method (Thermo Fisher Scientific iCAP 7200 Duo). Organic C (OC) concentration was calculated as the difference between TC and inorganic C (carbonate) concentration or by multiplying the SOM content derived using results of ash content by a factor of 0.5, thus assuming that SOM is 50 % carbon (Pribyl, 2010). In addition, the soil OC/TN ratio (C/N ratio) was calculated.

## 2.7 Other environmental variables

Concurrently with the soil respiration measurements, the following environmental variables were measured in each plot: air temperature; soil temperature at depths of 5, 10, 20, 30 and 40 cm; soil moisture (volumetric water content) at 5 cm depth; soil water-table level (WTL) using groundwater wells installed vertically down to a depth of 1.5–1.6 m.

## 2.8 Estimation of annual soil net CO<sub>2</sub> fluxes and CO<sub>2</sub> emission factors

Annual net CO<sub>2</sub> fluxes from soil were calculated as the difference between annual CO<sub>2</sub> output (annual soil R<sub>het</sub>) and annual C input into the soil with above- and belowground parts of vegetation (plant residues). We initially intended to utilize the directly measured R<sub>het</sub> values for these calculations; however, preliminary analyses showed that the directly measured R<sub>het</sub> values, which unlike R<sub>eco</sub> do not include autotrophic respiration, were higher than R<sub>eco</sub> in several study sites (Fig. S2, Fig. S3). Under similar conditions, R<sub>het</sub> should not be higher than R<sub>eco</sub>. Use of the directly measured R<sub>het</sub> values would thus have resulted in overestimation of the CO<sub>2</sub> output. Consequently, mean annual soil R<sub>het</sub> was calculated assuming that i) our R<sub>eco</sub> is equal to soil surface respiration (R<sub>s</sub>), and that ii) the proportion of annual soil R<sub>het</sub> from R<sub>s</sub> is 64 %, based on results of previous studies (n=61, Fig. S4) conducted in temperate and boreal regions (Jian et al., 2021). These assumptions were consistent with the most conservative approach and should clearly avoid underestimation of R<sub>het</sub> since our R<sub>eco</sub> values additionally included the dark respiration of the aboveground plant biomass, not included in the R<sub>s</sub>. Annual R<sub>eco</sub> was calculated for each study site separately as a cumulative value consisting of mean hourly values of R<sub>eco</sub> multiplied by the number of hours in a day and days in the





respective month covering all months in calendar year and expressed as  $t\ CO_2-C\ ha^{-1}\ yr^{-1}$ . The annual  $CO_2$  output from soil (annual soil  $R_{het}$ ) was then estimated as the 64 % value of the annual  $R_{eco}$ .

For cropland, the annual C input into the soil by the vegetation was divided into three components: aboveground harvest residues, belowground harvest residues, and belowground biomass litter. C input from aboveground harvest residues was calculated as the difference between C stock in the measured total aboveground biomass and C stock in harvested products (Eq. 2). C stock in harvested products was calculated using a harvest index (HI, Table 2), which is the ratio of harvested product to total aboveground biomass (Palosuo et al., 2015), resulting in Eq. (2):

$$Annual\ C\ input_{AGBHR} = C\ stock_{AGB} - (C\ stock_{AGB} \times HI), \quad (2)$$

where Annual C input<sub>AGBHR</sub> is annual C input from aboveground harvest residue ( $t\ C\ ha^{-1}\ yr^{-1}$ ), C stock<sub>AGB</sub> is C stock in total aboveground biomass ( $t\ C\ ha^{-1}$ ), HI is harvest index (Table 2).

For cropland, C input from belowground harvest residues was assumed to be equal to the C stock in the measured belowground biomass. The assumptions of annual C input into soil with belowground biomass litter are summarized in Table 2. For study sites where data on above- and/or below-ground biomass was not available, theoretical values summarized in Table 2 were used.

**Table 2. The estimated annual C inputs into soil with above- and belowground parts of vegetation (arable crops, perennial grass) in cases for which no data was collected in this study.**

| Arable crop, perennial grass | Harvest index (HI) | Annual C inputs into soil, $t\ C\ ha^{-1}\ yr^{-1}$ |                     |                            |                     |
|------------------------------|--------------------|-----------------------------------------------------|---------------------|----------------------------|---------------------|
|                              |                    | Aboveground harvest residues                        | Belowground biomass | Belowground biomass litter | Total               |
| Winter wheat                 | 0.39 <sup>a</sup>  | 3.00 <sup>a</sup>                                   | 0.50 <sup>a</sup>   | 0.21 <sup>a</sup>          | 3.71 <sup>a</sup>   |
| Spring wheat                 | 0.44 <sup>a</sup>  | 2.21 <sup>a</sup>                                   | 0.43 <sup>a</sup>   | 0.18 <sup>a</sup>          | 2.81 <sup>a</sup>   |
| Maize                        | 0.84 <sup>b</sup>  | 0.95 <sup>a,b</sup>                                 | 0.72 <sup>a</sup>   | 0.30 <sup>a</sup>          | 1.97 <sup>a,b</sup> |
| Beans                        | 0.28 <sup>a</sup>  | 3.11 <sup>a</sup>                                   | 0.23 <sup>a</sup>   | 0.09 <sup>a</sup>          | 3.43 <sup>a</sup>   |
| Rape                         | 0.35 <sup>b</sup>  | 1.95 <sup>b</sup>                                   | 0.58 <sup>b</sup>   | 0.40 <sup>b</sup>          | 2.92 <sup>b</sup>   |
| Fallow                       | 0.00 <sup>a</sup>  | 1.50 <sup>a</sup>                                   | 0.25 <sup>a</sup>   | 0.10 <sup>a</sup>          | 1.86 <sup>a</sup>   |
| Perennial grass              | 0.84 <sup>b</sup>  | 0.81 <sup>a,b</sup>                                 | 1.14 <sup>a</sup>   | 0.77 <sup>a</sup>          | 2.71 <sup>a,b</sup> |

<sup>a</sup> Source: Latvian State Forest Research Institute “Silava”, 2024

<sup>b</sup> Source: Palosuo et al., 2015

For grassland, it was either assumed that the C input into soil with aboveground parts of vegetation equalled the C stock in aboveground biomass in the end of vegetation season, or the C input was calculated using harvest index (Table 2), depending on study site and management practices. The C input into soil with belowground parts of vegetation was calculated assuming that the root turnover rate is 0.41 according to Palosuo et al. (2015). For study sites where data on above- and/or belowground biomass was not available, values summarized in Table 2 were used.

Mean annual net  $CO_2$  fluxes from soil, corresponding to emission factors as outlined by IPCC, were calculated from the site-level annual net fluxes.



## 2.9 Statistical analysis

Statistical analyses and visualization were conducted using the software environment R (version 4.3.3) and RStudio 2023.12.1 (R Core Team, 2024). The datasets of CO<sub>2</sub> fluxes (both R<sub>eco</sub> and R<sub>het</sub>) were not normally distributed according to the results of the Shapiro-Wilk normality test, both when all study sites were pooled and when each study site was tested separately (p < 0.001). To evaluate the differences between independent variables, for instance, differences in soil physico-chemical variables, R<sub>eco</sub> and R<sub>het</sub> between different types of land use (cropland, grassland), soil types (deep organic soil, shallow highly decomposed organic soil) or drainage (deep drained, shallow drained), Wilcoxon rank sum exact test and pairwise comparisons using Wilcoxon rank sum test with continuity correction was used; plot mean values were used for analysis.

Spearman's correlation coefficient (ρ) was used to assess the degree of dependence between pairs of variables. To explain the variation in mean instantaneous R<sub>eco</sub> calculated as average of monthly means (Y) among study sites (plot-level mean values were used), partial least squares (PLS) regression (multivariate method suitable for dealing with variables that are linearly correlated to each other, such as soil physico-chemical variables) was used. PLS regression analysis includes evaluation of X variables depending on their importance in explaining Y expressed as variables important for the projection (VIP values). X variables with VIP values below threshold of 0.5 were considered as insignificant and were not used in the PLS regression, while X variables with VIP values exceeding 1.0 were considered as important. All statistical analyses were carried out with a significance level of 95 % (α = 0.05). Results are expressed as mean values ± standard error (S.E.) unless stated otherwise.

## 3 Results

### 3.1 Soil physico-chemical variables

The soils of the study sites were characterized by high variation in both thickness of the soil organic layer (Table 1) and soil OC concentration, as well as other physico-chemical variables (Fig. 2, Fig. S5, Fig. S6). In the topsoil (0–20 cm layer), OC concentration ranged from <120 g kg<sup>-1</sup> in sites where the mean thickness of the soil organic layer was <30 cm and soil organic matter was highly mineralized and mixed with the underlying mineral soil as a result of soil ploughing, i.e., the shallow highly decomposed organic soils, to 526.8 g kg<sup>-1</sup> in sites with deep organic soil. In the topsoil of deep organic soils, the mean OC concentration in cropland was 365.0 ± 59.2 g kg<sup>-1</sup>, and in grassland 276.0 ± 36.8 g kg<sup>-1</sup>. In the topsoil of shallow highly decomposed organic soils, the mean OC concentration was significantly lower in both cropland (up to 73.7 ± 11.8 g kg<sup>-1</sup>) and grassland (up to 81.9 ± 22.7 g kg<sup>-1</sup>). Similarly, significantly higher TN concentrations were found in the topsoil of deep organic soils compared to shallow highly decomposed organic soils (25.7 ± 3.9 vs. 3.6 ± 2.3 g kg<sup>-1</sup> in cropland and 20.0 ± 2.4 vs. 5.7 ± 0.8 g kg<sup>-1</sup> in grassland, respectively). The mean P concentrations tended to be higher in deep organic soils, with significant difference observed only for grassland. No significant differences in soil C/N ratio were found between deep organic and shallow highly decomposed organic soils; the overall mean soil C/N ratio in the topsoil was 14.4 ± 0.6 in cropland and 13.6 ± 0.8 in grassland. In both cropland and grassland, significantly higher Ca concentrations were observed in the topsoil of deep



260 organic soils compared to shallow highly decomposed organic soils. In contrast, higher K and Mg concentrations were found in the topsoil of shallow highly decomposed organic soils, although significant difference was observed only for cropland. The mean topsoil bulk density also tended to be higher in shallow highly decomposed organic soils, but significant difference was observed only for grassland. The mean pH of the topsoil was  $6.1 \pm 0.3$  in cropland and  $5.9 \pm 0.1$  in grassland sites; no significant differences between the two soil types were found. Similar tendencies in differences in soil physico-chemical variables between deep organic soil and shallow highly decomposed organic soil were also observed for the 20–40 cm and 40–80 cm soil layers (Fig. S5 and Fig. S6).

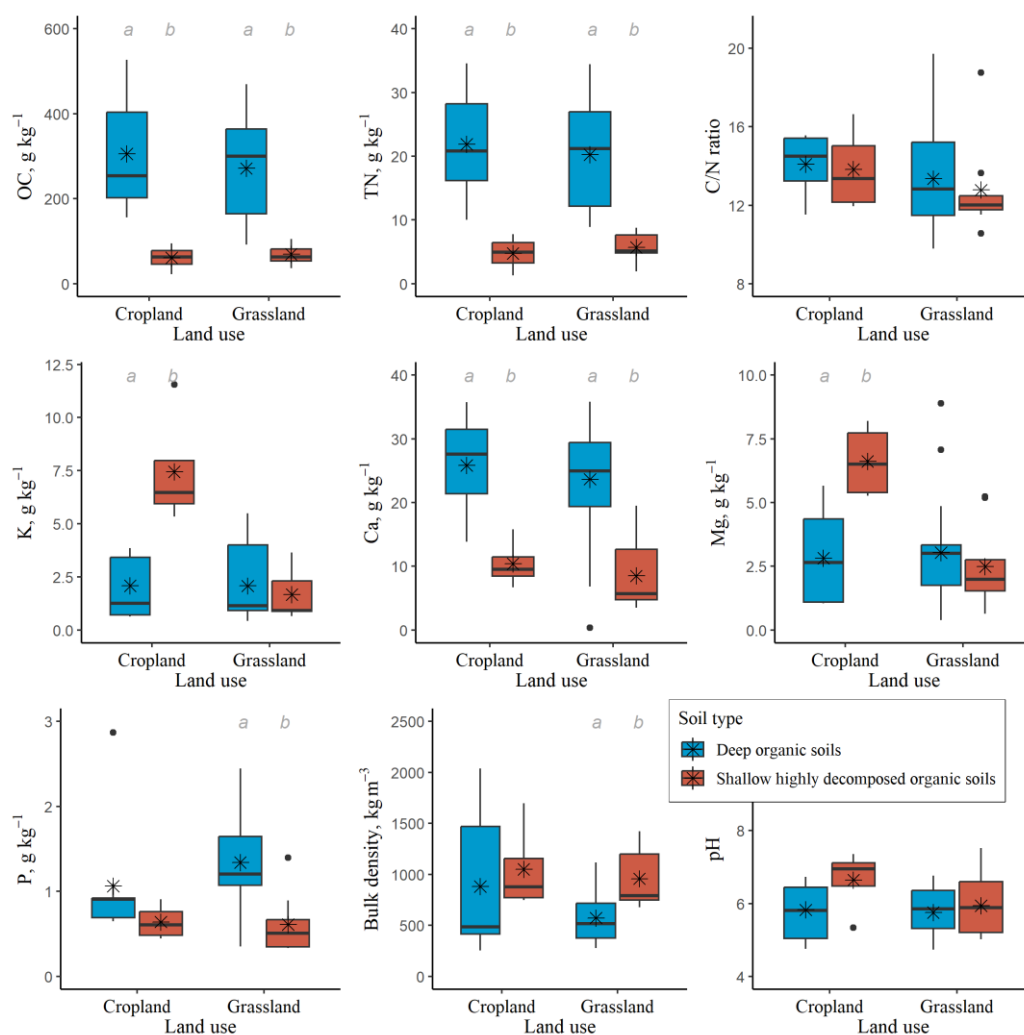

265

**Figure 2. Variation in topsoil (0–20 cm soil layer) characteristics in the cropland and grassland sites, separately for the two soil types (deep organic soil and shallow highly decomposed organic soil).** In the boxplots, median and mean values (bold horizontal lines and asterisks, respectively) are presented; plot mean values were used for analysis. The boxes indicate the interquartile range (from 25<sup>th</sup> to 75<sup>th</sup> percentiles), the whiskers denote the minimum and maximum values, and the black dots show outliers. Statistically significant differences ( $p < 0.05$ , Wilcoxon rank sum exact test) between deep organic soil and shallow highly decomposed organic soil within the type of land use are denoted by lowercase letters ab.

270



### 3.2 Ecosystem respiration (instantaneous)

Among different seasons the widest variation as well as the highest ( $p < 0.001$ ) mean intensity of instantaneous  $R_{eco}$  was observed in summer (Fig. 3, Fig. S7). Both in cropland and grassland, mean instantaneous  $R_{eco}$  decreased in the following order: summer  $>$  spring  $\approx$  autumn  $>$  winter. The mean instantaneous  $R_{eco}$  (average of monthly means) reflected emissions ( $CO_2$  release into atmosphere) that ranged among different study sites from  $71.9 \pm 21.0$  to  $194.8 \pm 79.0$   $mg\ CO_2-C\ m^{-2}\ h^{-1}$  in cropland and from  $59.9 \pm 15.4$  to  $190.9 \pm 60.4$   $mg\ CO_2-C\ m^{-2}\ h^{-1}$  in grassland. No statistically significant difference in mean instantaneous  $R_{eco}$  between study sites in cropland and grassland was observed ( $p = 0.319$ ).

In cropland, a significant difference ( $p < 0.001$ ) in mean instantaneous  $R_{eco}$  was observed between study sites with deep organic soil and shallow highly decomposed organic soil. Higher mean instantaneous  $R_{eco}$  was observed in sites with shallow highly decomposed organic soils (mean  $177.7 \pm 17.0$   $mg\ CO_2-C\ m^{-2}\ h^{-1}$ ) compared to sites with deep organic soils (mean  $117.1 \pm 13.5$   $mg\ CO_2-C\ m^{-2}\ h^{-1}$ ). A similar tendency of a higher mean instantaneous  $R_{eco}$  in sites with shallow highly decomposed organic soil was observed also in grassland (respectively,  $129.4 \pm 30.8$  vs.  $102.5 \pm 7.7$   $mg\ CO_2-C\ m^{-2}\ h^{-1}$ ), but the difference was not statistically significant ( $p = 0.689$ ). Additionally, in grassland, a slight tendency of a higher mean instantaneous  $R_{eco}$  in deep drained sites (mean WTL  $>$  30 cm) compared to shallow drained sites (mean WTL  $<$  30 cm) was observed (respectively,  $109.6 \pm 11.4$  vs.  $107.4 \pm 2.1$   $mg\ CO_2-C\ m^{-2}\ h^{-1}$ ), but the difference was not statistically significant ( $p = 0.924$ ).

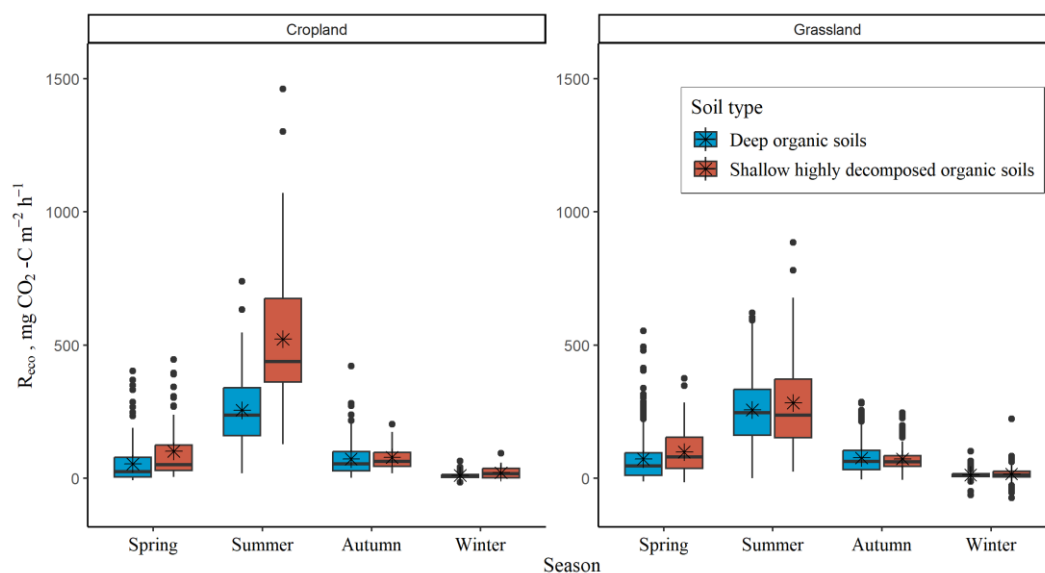

**Figure 3. Variation in instantaneous ecosystem respiration ( $R_{eco}$ ) among different seasons in the cropland (left graph) and grassland (right graph) sites, separately for the two soil types (deep organic soil and shallow highly decomposed organic soil).** In the boxplots, median and mean values (bold horizontal lines and asterisks, respectively) calculated from all performed  $R_{eco}$  measurements from all study sites and plots are presented. The boxes indicate the interquartile range (from 25<sup>th</sup> to 75<sup>th</sup> percentiles), the whiskers denote the minimum and maximum values, black dots show outliers. Spring – March, April, May; summer – June, July, August; Autumn – September, October, November; Winter – December, January, February.



295 In general, among the environmental variables measured during each gas sampling event (WTL, soil moisture, air and soil temperatures), variation in instantaneous  $R_{\text{eco}}$  was best described by a polynomial regression where the independent variable was soil temperature at 10-cm depth both in cropland and grassland (47–66 % of the variation explained depending on type of land use and soil, Fig. 4). Although WTL varied widely during the study period from slightly (3–4 cm) above soil surface to >150 cm below soil surface, no clear relationship between WTL and instantaneous  $R_{\text{eco}}$  was observed, neither when data from all study sites were pooled (Fig. 4) nor at single study site level. The response of instantaneous  $R_{\text{eco}}$  to WTL was highly site specific and  $R^2$  of site-level polynomial regressions was mostly below 0.25 with some exceptions of higher  $R^2$  showing an increase in instantaneous  $R_{\text{eco}}$  with higher WTL. Similarly, no clear relationship between soil moisture and instantaneous  $R_{\text{eco}}$  was observed. However, there were some indications of comparatively lower instantaneous  $R_{\text{eco}}$  both at very dry and water-saturated conditions.

305 In cropland, mean instantaneous  $R_{\text{eco}}$  was negatively correlated with soil Ca concentration and positively with soil K and Mg concentrations (Table S3). Although a moderate negative correlation between mean instantaneous  $R_{\text{eco}}$  and soil TC, OC and TN concentrations was also found, these correlations were not statistically significant (Table S3). The PLS analyses that attempted to explain the variation in mean instantaneous  $R_{\text{eco}}$  among the study sites with the soil physico-chemical variables resulted in a strong model for cropland (number of selected components is 4) with goodness of fit ( $R^2$ ) of 0.99 and goodness of prediction of 0.75 ( $Q^2$ , full cross-validation). The soil physico-chemical variables that best explained the variation ( $\text{VIP} > 1$ ) were the concentrations of K and Ca in the 0–20 and 20–40 cm soil layers. The PLS model also included variables with a  $\text{VIP} > 0.5$  (TC, OC, TN, Mg, P concentration, C/N ratio, pH, soil bulk density and thickness of organic soil layer, Table S4). The soil physico-chemical variables that were positively related to the mean instantaneous  $R_{\text{eco}}$  were K, Mg, and P concentration as well as pH, while the other soil physico-chemical variables were related negatively.

315 In contrast, for grassland, no significant correlations between mean instantaneous  $R_{\text{eco}}$  and soil physico-chemical variables were found (Table S3). Also, the PLS analyses using soil variables resulted in weak models ( $R^2 < 0.25$ ).

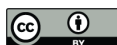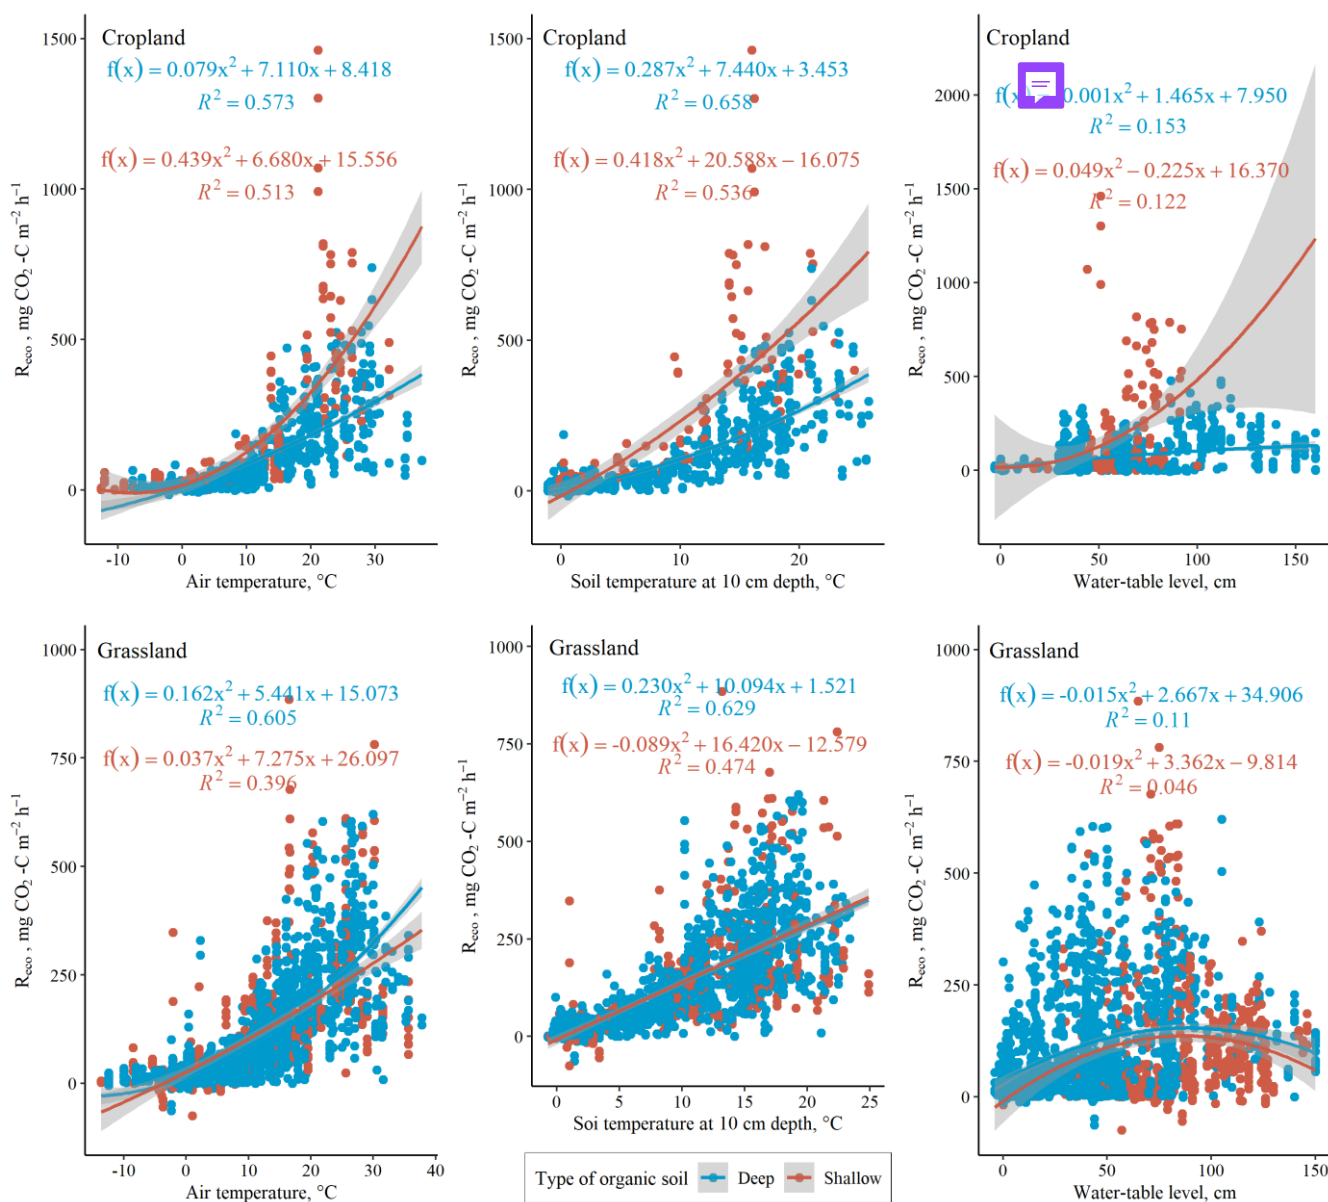

**Figure 4. Instantaneous ecosystem respiration ( $R_{eco}$ ) in cropland and grassland as a function (polynomial regression) of air temperature, soil temperature at 10 cm depth and water-table level.** Data of instantaneous ecosystem respiration is grouped by soil type (deep organic soil denoted by blue colour and shallow highly decomposed organic soil denoted by red colour). Grey area around regression line reflects the confidence interval of regression.

### 3.3 Soil heterotrophic respiration (instantaneous)

During the study period (April–November), the widest variation and highest mean intensity of instantaneous  $R_{het}$  was observed in the summer months (June–August) both in cropland and grassland (Fig. 5, Fig. S8). Monthly mean instantaneous  $R_{het}$  among different study sites ranged from  $41.1 \pm 5.2$  in November to  $662.6 \pm 69.6$  mg CO<sub>2</sub>-C m<sup>-2</sup> h<sup>-1</sup> in July in cropland and from  $18.6$



$\pm 3.2$  in November to  $652.3 \pm 58.1$  mg CO<sub>2</sub>-C m<sup>-2</sup> h<sup>-1</sup> in July in grassland. The mean instantaneous R<sub>het</sub> (average of monthly means) ranged among different study sites from  $158.4 \pm 30.7$  to  $295.8 \pm 72.9$  mg CO<sub>2</sub>-C m<sup>-2</sup> h<sup>-1</sup> in cropland and from  $90.0 \pm 19.8$  to  $291.8 \pm 56.6$  mg CO<sub>2</sub>-C m<sup>-2</sup> h<sup>-1</sup> in grassland. No statistically significant difference in mean instantaneous R<sub>eco</sub> between study sites in cropland and grassland was observed ( $p = 0.776$ ).

330 In cropland, the overall mean instantaneous R<sub>het</sub> (average of monthly means) was significantly higher ( $p = 0.009$ ) in the study sites with shallow highly decomposed organic soils (mean  $237.3 \pm 58.5$  mg CO<sub>2</sub>-C m<sup>-2</sup> h<sup>-1</sup>) compared to study sites with deep organic soils (mean  $158.8 \pm 0.4$  mg CO<sub>2</sub>-C m<sup>-2</sup> h<sup>-1</sup>). For grassland, no statistically significant differences in mean instantaneous R<sub>het</sub> were observed, neither between study sites grouped depending on soil type nor between study sites grouped depending on drainage (deep or shallow drained) status ( $p = 0.495$  and  $p = 0.743$ , respectively). In grassland, mean instantaneous R<sub>het</sub> was  
335  $192.3 \pm 25.5$  mg CO<sub>2</sub>-C m<sup>-2</sup> h<sup>-1</sup>.

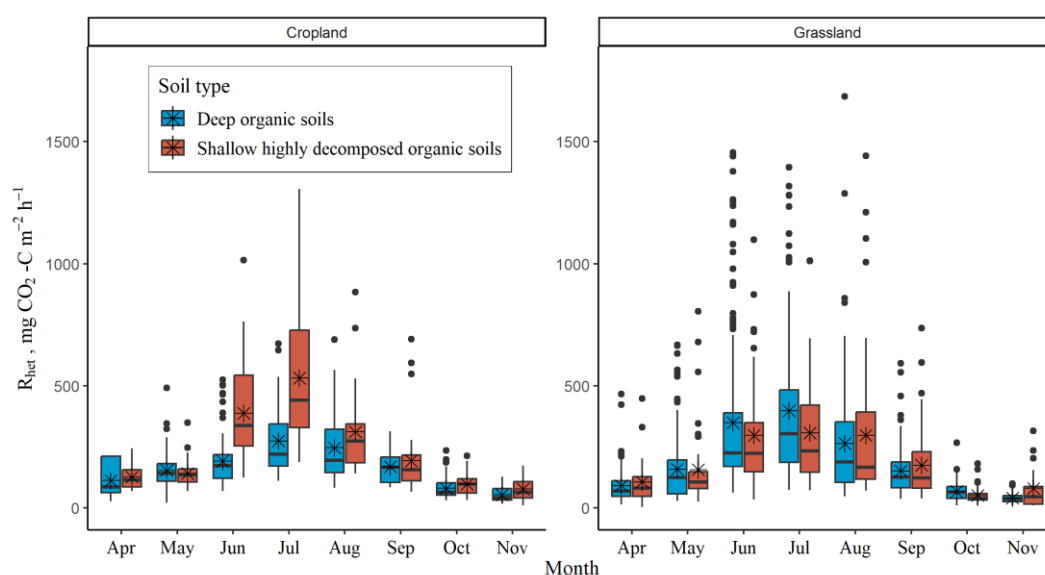

340 **Figure 5. Variation of instantaneous soil heterotrophic respiration (R<sub>het</sub>) in cropland (left graph) and grassland (right graph) from April to November grouped depending on soil type (deep organic soil and shallow highly decomposed organic soil).** In the boxplots, median and mean values (bold horizontal lines and asterisks, respectively) calculated from all performed R<sub>het</sub> measurements in four study sites in cropland and nine study sites in grassland are presented. The boxes indicate the interquartile range (from 25<sup>th</sup> to 75<sup>th</sup> percentiles), the whiskers denote the minimum and maximum values, black dots show outliers.

The relationship between instantaneous R<sub>het</sub> and soil temperature at 10-cm depth differed somewhat between the two soil types (Fig. 6). Further, it was in several cases different from that of R<sub>eco</sub> (Fig. S2 and Fig. S3). Comparison of instantaneous soil R<sub>eco</sub>  
345 and R<sub>het</sub> as a function of soil temperature at 10-cm depth showed that instantaneous R<sub>het</sub> tended to exceed R<sub>eco</sub> in several study sites.

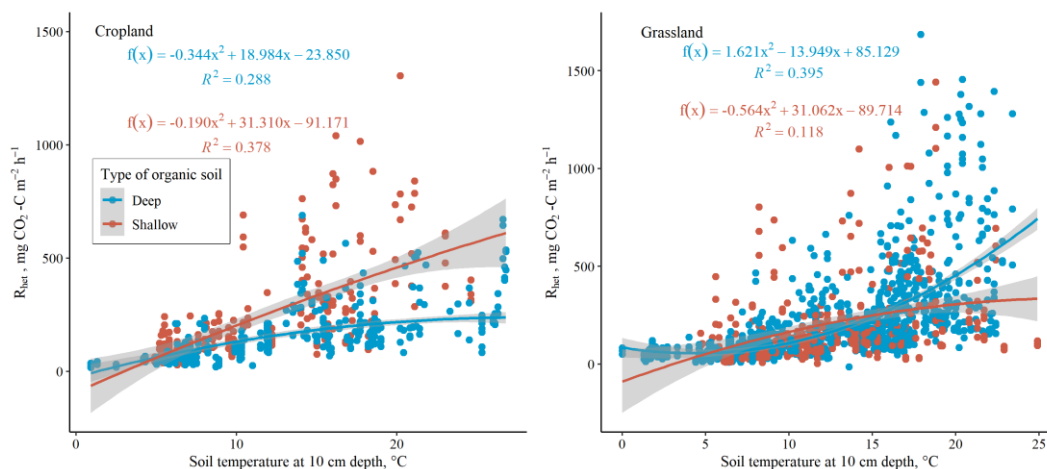

**Figure 6. Instantaneous soil heterotrophic respiration ( $R_{het}$ ) in cropland (left graph) and grassland (right graph) as a function (polynomial regression) of soil temperature at 10-cm depth.** Data of instantaneous soil heterotrophic respiration is grouped depending on soil type (deep organic soil denoted by blue and shallow highly decomposed organic soil denoted by red colour). Grey area around the regression line reflects the confidence interval.

### 3.4 Carbon stocks in, and annual inputs into soil through, vegetation

In the end of growing season, average C stock in plant biomass (total including above- and belowground parts) was  $4.94 \pm 0.55$  t C ha<sup>-1</sup> in cropland and  $3.65 \pm 0.97$  t C ha<sup>-1</sup> in grassland (Fig. 7). In cropland, the largest part of the C stock was in the aboveground biomass (91 % of total C stock;  $4.50 \pm 0.49$  t C ha<sup>-1</sup>), while in grassland a larger C stock was found in the belowground biomass (63 % of total C stock;  $2.31 \pm 0.78$  t C ha<sup>-1</sup>) than in aboveground part ( $1.26 \pm 0.26$  t C ha<sup>-1</sup>). Among the studied agricultural crops, the largest C stock in plant biomass (total) was estimated for maize (6.7 t C ha<sup>-1</sup>), but the lowest for spring wheat (2.3 t C ha<sup>-1</sup>, Fig. S9).

Estimated mean annual C input (total including above- and belowground parts) was  $2.65 \pm 0.31$  t C ha<sup>-1</sup> yr<sup>-1</sup> in cropland and  $2.35 \pm 0.36$  t C ha<sup>-1</sup> yr<sup>-1</sup> in grassland (Fig. 7). In cropland, the largest annual C input was aboveground harvest residues (74 % of total annual C input;  $1.97 \pm 0.34$  t C ha<sup>-1</sup> yr<sup>-1</sup>), while in grassland the amount of belowground inputs ( $1.19 \pm 0.27$  t C ha<sup>-1</sup> yr<sup>-1</sup>) was similar than the aboveground inputs ( $1.16 \pm 0.26$  t C ha<sup>-1</sup> yr<sup>-1</sup>). Among the studied agricultural crops, the largest annual C input (total) was estimated for rape (4.1 t C ha<sup>-1</sup> yr<sup>-1</sup>), but the lowest for spring wheat (1.5 t C ha<sup>-1</sup> yr<sup>-1</sup>, Fig. S9).

The mean concentrations of both C and N were higher in aboveground biomass compared to below ground biomass, while C/N ratio was higher in belowground biomass both for arable crops and perennial grass (Table 3).



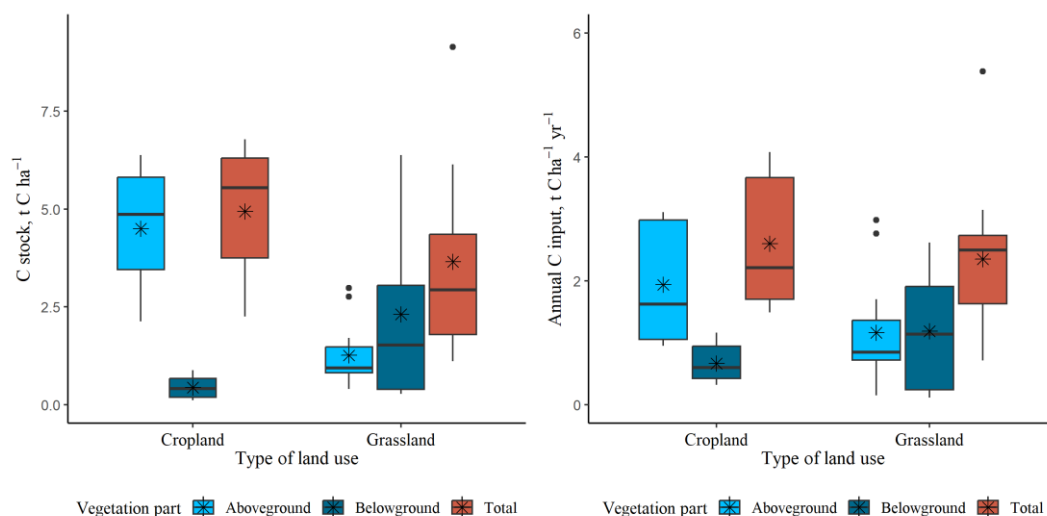

370 **Figure 7. Variation in carbon (C) stock in above- and belowground plant biomass at the end of growing season (left graph) and annual C inputs into soil (right graph) in cropland and grassland.** In the boxplots, median and mean values (bold lines and asterisks, respectively) are presented. The boxes indicate the interquartile range (from 25<sup>th</sup> to 75<sup>th</sup> percentiles), the whiskers denote the minimum and maximum values, and black dots show outliers.

**Table 3. Mean carbon (C) and nitrogen (N) concentration and C/N ratio in above- and belowground plant biomass in the studied croplands and grasslands.**

| Type of land use, vegetation      | Value       | C concentration, g kg <sup>-1</sup> |             | N concentration, g kg <sup>-1</sup> |             | C/N ratio   |             |
|-----------------------------------|-------------|-------------------------------------|-------------|-------------------------------------|-------------|-------------|-------------|
|                                   |             | Aboveground                         | Belowground | Aboveground                         | Belowground | Aboveground | Belowground |
| Cropland, arable crops (n=10)     | Mean ± S.E. | 450 ± 4                             | 404 ± 4     | 17 ± 2                              | 11 ± 1      | 29 ± 3      | 40 ± 4      |
|                                   | Median      | 449                                 | 414         | 17                                  | 9           | 28          | 44          |
|                                   | Range       | 431–473                             | 383–414     | 11–26                               | 8–18        | 19–42       | 22–51       |
| Grassland, perennial grass (n=12) | Mean ± S.E. | 449 ± 2                             | 407 ± 16    | 20 ± 2                              | 16 ± 2      | 25 ± 2      | 28 ± 2      |
|                                   | Median      | 447                                 | 402         | 18                                  | 16          | 26          | 26          |
|                                   | Range       | 442–463                             | 347–484     | 13–30                               | 10–24       | 15–34       | 20–36       |

375

### 3.5 Annual net CO<sub>2</sub> fluxes

The annual CO<sub>2</sub> fluxes depended equally on both C losses and C inputs into soil, which both, but in particular the C losses, varied widely. The studied drained organic agricultural soils were all net sources of CO<sub>2</sub>, i.e. C losses due to the estimated soil heterotrophic respiration exceeded C inputs into soil as plant residues (Table 4). The mean annual net CO<sub>2</sub> emissions in cropland and grassland were overall quite similar (p = 0.270). In cropland, the mean annual net CO<sub>2</sub> emissions were 4.8 ± 0.8 t CO<sub>2</sub>-C ha<sup>-1</sup> yr<sup>-1</sup> (all sites pooled); higher net emissions were observed in sites with shallow highly decomposed organic soil (7.0 ± 1.5 t CO<sub>2</sub>-C ha<sup>-1</sup> yr<sup>-1</sup>) than in deep organic soils (4.1 ± 0.7 t CO<sub>2</sub>-C ha<sup>-1</sup> yr<sup>-1</sup>). In grassland, the mean annual net CO<sub>2</sub>

380



emissions were  $3.8 \pm 0.7$  t CO<sub>2</sub>-C ha<sup>-1</sup> yr<sup>-1</sup> (all sites pooled), while, similarly to cropland, higher net emissions were observed in sites with shallow highly decomposed organic soil (mean  $5.6 \pm 2.1$  t CO<sub>2</sub>-C ha<sup>-1</sup> yr<sup>-1</sup>) than deep organic soils (mean  $3.2 \pm 0.6$  t CO<sub>2</sub>-C ha<sup>-1</sup> yr<sup>-1</sup>). However, the difference in mean annual net CO<sub>2</sub> emissions between deep organic soils and shallow highly decomposed organic was not statistically significant ( $p = 0.143$  for cropland sites and  $p = 0.209$  for grassland sites). It should be noted however that sites with shallow highly decomposed organic soil were relatively underrepresented in the study. The mean annual net CO<sub>2</sub> emissions from deep-drained and shallow-drained study sites in grassland were similar as well ( $p = 0.889$ ).

The contribution of winter (December–February) CO<sub>2</sub> emissions to total annual R<sub>eco</sub> was on average 2.4 % in cropland and 3.2 % in grassland, while the contribution of summer (June–August) CO<sub>2</sub> emissions was on average 63.9 % in cropland and 60.3 % in grassland.

**Table 4. Annual ecosystem respiration (R<sub>eco</sub>), heterotrophic soil respiration (R<sub>het</sub>) estimated from R<sub>eco</sub> (described in Sect. 2.8), C input into soil as plant residues, and the estimated net soil CO<sub>2</sub> emissions in cropland and grassland in the Baltic states, hemiboreal region of Europe.** The deep organic soils of the sites were either Histosols, Gleysols or Phaeozems, while the shallow highly decomposed organic soils were either Gleysols, Phaeozems or Umbrisols (WRB, 2014).

| Study site                                                | Value           | R <sub>eco</sub> , t CO <sub>2</sub> -C ha <sup>-1</sup> yr <sup>-1</sup> | R <sub>het</sub> , t CO <sub>2</sub> -C ha <sup>-1</sup> yr <sup>-1</sup> | C <sub>input</sub> , t C ha <sup>-1</sup> yr <sup>-1</sup> | Net CO <sub>2</sub> emissions, t CO <sub>2</sub> -C ha <sup>-1</sup> yr <sup>-1</sup> |
|-----------------------------------------------------------|-----------------|---------------------------------------------------------------------------|---------------------------------------------------------------------------|------------------------------------------------------------|---------------------------------------------------------------------------------------|
| <b>Type of land use: Cropland</b>                         |                 |                                                                           |                                                                           |                                                            |                                                                                       |
| All sites (n = 8)                                         | Mean ± S.E.     | 11.7 ± 1.3                                                                | 7.5 ± 0.8                                                                 | 2.7 ± 0.3                                                  | 4.8 ± 0.8                                                                             |
|                                                           | Median          | 12.3                                                                      | 7.8                                                                       | 2.4                                                        | 5.0                                                                                   |
|                                                           | Range (min–max) | 6.3–17.2                                                                  | 4.1–11.0                                                                  | 1.5–3.7                                                    | 2.4–8.5                                                                               |
| Sites with deep organic soil (n = 6)                      | Mean ± S.E.     | 10.3 ± 1.2                                                                | 6.6 ± 0.8                                                                 | 2.5 ± 0.4                                                  | 4.1 ± 0.7                                                                             |
|                                                           | Median          | 10.6                                                                      | 6.8                                                                       | 2.2                                                        | 3.6                                                                                   |
|                                                           | Range (min–max) | 6.3–13.7                                                                  | 4.1–8.8                                                                   | 1.5–3.7                                                    | 2.4–6.8                                                                               |
| Sites with shallow highly decomposed organic soil (n = 2) | Mean ± S.E.     | 15.7 ± 1.5                                                                | 10.0 ± 1.0                                                                | 3.0 ± 0.5                                                  | 7.0 ± 1.5                                                                             |
|                                                           | Median          | -                                                                         | -                                                                         | -                                                          | -                                                                                     |
|                                                           | Range (min–max) | 14.2–17.2                                                                 | 9.1–11.0                                                                  | 2.4–3.5                                                    | 5.5–8.5                                                                               |
| <b>Type of land use: Grassland</b>                        |                 |                                                                           |                                                                           |                                                            |                                                                                       |
| All sites (n = 12)                                        | Mean ± S.E.     | 9.6 ± 0.8                                                                 | 6.2 ± 0.5                                                                 | 2.3 ± 0.4                                                  | 3.8 ± 0.7                                                                             |
|                                                           | Median          | 9.1                                                                       | 5.9                                                                       | 2.5                                                        | 3.4                                                                                   |
|                                                           | Range (min–max) | 5.3–16.8                                                                  | 3.4–10.8                                                                  | 0.7–5.4                                                    | 0.7–9.7                                                                               |
| Sites with deep organic soil (n = 9)                      | Mean ± S.E.     | 9.0 ± 0.7                                                                 | 5.8 ± 0.4                                                                 | 2.6 ± 0.5                                                  | 3.2 ± 0.6                                                                             |
|                                                           | Median          | 9.3                                                                       | 6.0                                                                       | 2.7                                                        | 3.2                                                                                   |
|                                                           | Range (min–max) | 5.3–11.3                                                                  | 3.4–7.2                                                                   | 0.7–5.4                                                    | 0.7–6.5                                                                               |
| Deep-drained sites with deep organic soil (n = 7)         | Mean ± S.E.     | 8.9 ± 0.9                                                                 | 5.7 ± 0.6                                                                 | 2.5 ± 0.6                                                  | 3.2 ± 0.8                                                                             |
|                                                           | Median          | 8.3                                                                       | 5.3                                                                       | 2.7                                                        | 2.2                                                                                   |
|                                                           | Range (min–max) | 5.3–11.3                                                                  | 3.4–7.2                                                                   | 0.7–5.4                                                    | 0.7–6.5                                                                               |



| Study site                                                | Value           | $R_{\text{eco}}$ , t CO <sub>2</sub> -C ha <sup>-1</sup> yr <sup>-1</sup> | $R_{\text{net}}$ , t CO <sub>2</sub> -C ha <sup>-1</sup> yr <sup>-1</sup> | $C_{\text{input}}$ , t C ha <sup>-1</sup> yr <sup>-1</sup> | Net CO <sub>2</sub> emissions, t CO <sub>2</sub> -C ha <sup>-1</sup> yr <sup>-1</sup> |
|-----------------------------------------------------------|-----------------|---------------------------------------------------------------------------|---------------------------------------------------------------------------|------------------------------------------------------------|---------------------------------------------------------------------------------------|
| Shallow-drained sites with deep organic soil (n = 2)      | Mean ± S.E.     | 9.5 ± 0.2                                                                 | 6.1 ± 0.1                                                                 | 2.7 ± 0.02                                                 | 3.3 ± 0.1                                                                             |
|                                                           | Median          | -                                                                         | -                                                                         | -                                                          | -                                                                                     |
|                                                           | Range (min–max) | 9.3–9.6                                                                   | 6.0–6.2                                                                   | 2.7–2.8                                                    | 3.2–3.4                                                                               |
| Sites with shallow highly decomposed organic soil (n = 3) | Mean ± S.E.     | 11.4 ± 2.7                                                                | 7.3 ± 1.7                                                                 | 1.7 ± 0.4                                                  | 5.6 ± 2.1                                                                             |
|                                                           | Median          | 9.0                                                                       | 5.8                                                                       | 1.8                                                        | 3.5                                                                                   |
|                                                           | Range (min–max) | 8.3–16.8                                                                  | 5.3–10.8                                                                  | 1.1–2.3                                                    | 3.5–9.7                                                                               |

#### 4 Discussion

This is the first region-level study to estimate annual net soil CO<sub>2</sub> emissions from cropland and grassland on drained organic soils in the hemiboreal region. Our study sites covered organic soils with a wide range in both the thickness of the organic soil layer and the OC concentration in the topsoil (0–20 cm). Thus, we could examine separately deep organic soils and soils that we call shallow highly decomposed organic soils. We consider based on existing soil information that the soils of all our sites were originally (before drainage) deep peat soils. Organic carbon (OC) concentration of 12 % in 0–20 cm soil layer was set as the threshold value for definition of organic soils by the IPCC (Eggleston et al., 2006), and our shallow soils would not be classified as organic soils according to this definition. Yet, we recorded as high CO<sub>2</sub> emissions from them as from the deep organic soils meeting the threshold. It supported the recent highlight by Liang et al. (2024) of global underestimation of area-scaled CO<sub>2</sub> emissions from drained organic soils undergoing transition from organic to organo-mineral soils due to agricultural management.

To estimate the annual net CO<sub>2</sub> fluxes from soil or emission factors, we combined the ecosystem inputs and outputs as CO<sub>2</sub> fluxes into net fluxes by combining estimates from study sites in the Baltic states with similar characteristics. All the studied drained organic soils in cropland and grassland were sources of CO<sub>2</sub> to the atmosphere. In general, our results are in line with the tendency stated by the IPCC (Eggleston et al., 2006; Hiraishi et al., 2014) and several previous studies (Kasimir-Klmedtsson et al., 1997; Alm et al., 2007; Elsgaard et al., 2012; Fell et al., 2016) that mean annual net CO<sub>2</sub> emissions in cropland exceed net CO<sub>2</sub> emissions in grassland. Within our study, this tendency was mainly related to the higher mean annual  $R_{\text{eco}}$  and subsequently also annual  $R_{\text{het}}$  (calculated as a proportion of  $R_{\text{eco}}$ ) in cropland than grassland, despite slightly higher C input into soil as plant residues in cropland, as well as larger belowground (root) biomass and longer vegetation period under grass compared with arable crops. However, overlap in the values in cropland and grassland has been noted in both our study and previous studies as well (Couwenberg, 2011).

Although results obtained in this study may contain slight overestimation rather than underestimation, our estimates of annual net CO<sub>2</sub> emissions both in cropland and grassland with deep-drained organic soil were lower than the IPCC (Hiraishi et al., 2014) mean values of net CO<sub>2</sub> emissions expressed as emission factors for the temperate and boreal climate/vegetation zone (nutrient-rich soils). The net CO<sub>2</sub> emissions from shallow highly decomposed organic soils coincided with the 95 % confidence



intervals of the IPCC emission factors (Table 5). Our estimates of annual net CO<sub>2</sub> emissions for grassland with shallow-drained organic soil were in line with the IPCC emission factor (Table 5). Interestingly, we found no difference in annual net CO<sub>2</sub> emissions between deep- and shallow-drained organic soils in grassland, although WTL was < 30 cm in 69 % and < 20 cm in 50 % of all measurement events in shallow-drained sites. Distinguishing these is suggested by IPCC (Hiraishi et al., 2014) and logically, WTL that is at least in principle regulated by drainage depth regulates in turn the thickness of the soil layer where efficient aerobic decomposition may take place. It could be explained by the limited number of study sites with shallow-drained organic soils in grassland (n = 2), however.

430 **Table 5. Comparison of estimated and IPCC (Hiraishi et al., 2014) default net CO<sub>2</sub> emissions expressed as emission factors for drained nutrient-rich organic soils in cropland and grassland.**

| Land use, drainage status  | Net CO <sub>2</sub> emissions, t CO <sub>2</sub> -C ha <sup>-1</sup> yr <sup>-1</sup> |                   |                                        |                                                                                                  |               |
|----------------------------|---------------------------------------------------------------------------------------|-------------------|----------------------------------------|--------------------------------------------------------------------------------------------------|---------------|
|                            | Estimates from this study (mean ± S.E.)                                               |                   |                                        | IPCC (Hiraishi et al., 2014) default CO <sub>2</sub> emission factors (95 % confidence interval) |               |
|                            | Hemiboreal                                                                            |                   |                                        | Boreal                                                                                           | Temperate     |
|                            | All study sites                                                                       | Deep organic soil | Shallow highly decomposed organic soil | Deep organic soil                                                                                |               |
| Cropland                   | 4.8 ± 0.8                                                                             | 4.1 ± 0.7         | 7.0 ± 1.5                              | 7.9 (6.5–9.4)                                                                                    |               |
| Grassland, deep-drained    | 3.8 ± 0.7                                                                             | 3.2 ± 0.8         | 5.6 ± 2.1                              | 5.7 (2.9–8.6)                                                                                    | 6.1 (5.0–7.3) |
| Grassland, shallow-drained |                                                                                       | 3.3 ± 0.1         | -                                      |                                                                                                  | 3.6 (1.8–5.4) |

During the last decade (i.e. in the period after the latest IPCC default emission factors were elaborated) several new studies were conducted in temperate and boreal regions (central and northern Europe), reporting CO<sub>2</sub> emission values ranging within or slightly outside the 95 % confidence interval of the IPCC default CO<sub>2</sub> emission factors (Hiraishi et al., 2014). For instance, mean C losses from drained organic soils of 6.45 t C ha<sup>-1</sup> yr<sup>-1</sup> were reported for arable land in Germany (Fell et al., 2016), while values between 3.1 and 7.55 t C ha<sup>-1</sup> yr<sup>-1</sup> were reported for drained organic soils in grasslands in Switzerland and Germany (Fell et al., 2016; Tiemeyer et al. 2016; Wang et al. 2021). In general, recent studies continue to highlight a relatively large variability which can be explained by the differences in climate (weather conditions), peat chemistry, time since establishment and aspects of maintenance of drainage systems, WTL, and land-management practices and intensity including cultivation methods and crops (Maljanen et al., 2010; Leifeld et al., 2011, Tiemeyer et al., 2016). However, it should be also noted that different approaches to measure or estimate soil C losses are used among studies, including estimation of peatland subsidence, measuring CO<sub>2</sub> fluxes using chamber methods or eddy covariance as well as by modelling (Kasimir-Klemedtsson et al., 1997; Fell et al., 2016), and all approaches contain some assumptions, advantages and disadvantages, which have to be considered (Kasimir-Klemedtsson et al., 1997; Maljanen et al., 2010; Phillips et al., 2017).

445 Although the CO<sub>2</sub> emission factors elaborated here for cropland and grassland with drained organic soils are regional in nature, covering the Baltic states, they provide a general opportunity to improve national GHG inventories and fill knowledge gaps regarding hemiboreal region of Europe. Further research is needed to elaborate dynamic temperature-dependent CO<sub>2</sub> emission



factors, considering that differences in responses of CO<sub>2</sub> fluxes to temperature in different climatic subregions even within the same region or country are possible (Alm et al., 2007). In addition, elaboration of CO<sub>2</sub> emission factors in terms of accuracy  
450 would benefit from quantitative separation of R<sub>het</sub> from R<sub>eco</sub> in arable land and grassland, where the annual production, rotation and management of plant biomass is highly dynamic and differences in the proportion of R<sub>het</sub> between cropland and grassland are expected. Another aspect to pay attention to when assessing CO<sub>2</sub> emissions in long-term specifically in grasslands is the impact of periodical ploughing of grasslands for renovation by reseeded – a widely used grassland management practice in the hemiboreal region of Europe. Such practices result in additional C inputs to the soil with belowground biomass (plant  
455 residues) and consequently can lead to increased R<sub>het</sub> (Reinsch et al., 2018). Within our study, the impact of ploughing of grasslands for renovation by reseeded on CO<sub>2</sub> fluxes was not estimated.

Our flux measurements covered both ecosystem respiration (R<sub>eco</sub>) and heterotrophic respiration (R<sub>het</sub>). R<sub>eco</sub> represented the gross respiration rate: CO<sub>2</sub> produced by the plant–soil system including soil heterotrophic respiration (aerobic and anaerobic decomposition processes, respiration of soil microorganisms and animals) and autotrophic respiration (CO<sub>2</sub> produced by living  
460 plant roots and associated rhizosphere as well as by dark respiration of the plants' aboveground parts) (e.g., Maljanen et al., 2002; Maljanen et al., 2007). Both R<sub>eco</sub> and R<sub>het</sub> were primarily regulated by temperature, especially soil temperature at 10 cm depth. Thus, our study is in line with previous findings that soil temperature is the main driver of overall ecosystem respiration (Nieveen et al., 2005; Elsgaard et al., 2012) as well as peat decomposition specifically (Mäkiranta et al., 2009). For R<sub>eco</sub> we were able to continue the measurements over the winter seasons. Due to cold temperatures, the contribution of winter  
465 (December–February) fluxes was minor, on average 2–3 % in both grassland and cropland. Nevertheless, CO<sub>2</sub> released during winter cannot be disregarded when annual CO<sub>2</sub> emissions are estimated, especially when the soil C balance is close to neutral. Soil WTL has earlier been found to be the overriding variable explaining GHG emissions when examining a wide range of unmanaged and managed peatlands (Evans et al. 2021). Somewhat surprisingly, we found no clear evidence that the variation of WTL and soil moisture would have an impact on the magnitude of the CO<sub>2</sub> fluxes. Yet, there were some indications of  
470 comparatively lower instantaneous R<sub>eco</sub> and R<sub>het</sub> at both very dry and water-saturated conditions. Similarly, no clear quantitative CO<sub>2</sub> response to WTL among study sites with drained organic soils under agricultural management has been reported also previously (Nieveen et al., 2005; Elsgaard et al., 2012; Tiemeyer et al., 2016) and then explained by rather deep WTL, indicating that lack of moisture in the topmost soil layers may restrict R<sub>het</sub>. There is also some earlier evidence that soil moisture may have a parabolic influence on CO<sub>2</sub> fluxes (e.g. Säurich et al., 2019b), our results now slightly supporting that.  
475 Inconsistent results regarding WTL as controlling factor of soil respiration can be obtained also due to, for instance, different hydraulic conductivity of the studied soils (Parmentier et al., 2009). Soil moisture could then in principle be a more suitable variable; however, our results do not support that either. Put together, ours and previous results indicate that among drained and managed sites, where the WTL is generally deeper and varies less than when also undrained and unmanaged sites are included in the data, WTL may not be the single overriding factor linearly regulating the soil CO<sub>2</sub> fluxes.  
480 Higher R<sub>eco</sub> and R<sub>het</sub> was observed in shallow highly decomposed organic soil with OC concentration <12 % at 0–20 cm soil layer than in deep organic soils meeting the threshold. This was the case especially in cropland, where the difference was



statistically significant. At the same time, no clear (strong and significant) correlation between mean  $R_{\text{eco}}$  and  $R_{\text{het}}$  and OC content in soil was identified. In general, our finding of higher  $R_{\text{eco}}$  and  $R_{\text{het}}$  in soils with highly decomposed soil organic matter layer is not surprising because some previous studies have highlighted similar tendency. For instance, Säurich et al. (2019a) concluded that the magnitude of soil specific basal respiration increased with increasing soil disturbance (i.e. with lower soil OC concentration) caused by drainage-induced mineralization and organic soil layer mixing with mineral soils. Also other previous studies (Leiber-Sauheitl et al., 2014; Eickenscheidt et al., 2015; Liang et al., 2024) highlighted that the magnitude of CO<sub>2</sub> emissions from drained organic soils used for agriculture is not affected by OC concentration in the soil histic horizon. In contrast, Norberg et al (2016) found significantly lower CO<sub>2</sub> emissions from peaty marls with low total C concentration (9.5–

485  
490

12.2 %) than from peats with much higher total C concentration (27.2–42.8 %). However, our study improves knowledge on soils that may have fulfilled the criteria of organic soil in the past, but not any more after long-term land use. In general, estimation of mean CO<sub>2</sub> flux within our study could be slightly overestimated as all CO<sub>2</sub> flux measurements were conducted during the daytime, and previous studies have concluded that mean CO<sub>2</sub> production occurring during the daytime is 14–23 % higher than the mean daily fluxes (Maljanen et al., 2002). This is largely caused by diurnal variation in air

495

temperature and consequently soil temperature which are intercorrelated parameters. Thus, for further evaluations, regression describing variation in  $R_{\text{eco}}$  depending on soil temperature could be used to avoid overestimation of  $R_{\text{eco}}$  due to lack of measurements during night. Contrary to expectations, the magnitude of instantaneous  $R_{\text{het}}$  tended to exceed the  $R_{\text{eco}}$  in several study sites. It is inconsistent with the theoretical basis that  $R_{\text{het}}$  is a part of  $R_{\text{eco}}$  and thus simultaneously recorded values should be lower than  $R_{\text{eco}}$ . The observed inconsistency is most likely explained by **methodological nuances**. Measurement points established for  $R_{\text{het}}$  involved trenching, vegetation removal, and keeping the soil surface bare. This may elevate the magnitude of  $R_{\text{het}}$  firstly by higher temperature in bare soil than under vegetation. Further, soil moisture conditions may differ from vegetated soil. In permanent grassland, decomposition of the killed roots are likely to further add to  $R_{\text{het}}$ . These aspects have been discussed as challenges of the root exclusion method also before (Hanson et al., 2000; Kuzyakov, 2006; Norberg et al., 2016). In general, previous studies on cultivated peat soils in central and southern Sweden suggest that the contribution of  $R_{\text{het}}$  to cumulative total CO<sub>2</sub> emission (ecosystem respiration) is in the range from 37 to 73 % depending on soil type, crop type and season (Berglund et al., 2011; Norberg et al., 2016; Berglund et al., 2021), while the mean proportion of  $R_{\text{het}}$  from soil surface respiration is 64 % based on previous studies (n = 61) conducted in agricultural land in temperate and boreal regions (Jian et al., 2021). Considering the previously mentioned, we used  $R_{\text{het}}$  values derived from the results of  $R_{\text{eco}}$  for estimation of annual  $R_{\text{het}}$  and subsequently annual net CO<sub>2</sub> emission from soil. Such an approach was applied to avoid overestimation of  $R_{\text{het}}$  or C losses from soil. Yet, even the method that we used may result in overestimates, as our  $R_{\text{eco}}$  values are higher than soil surface respiration since they additionally include dark respiration of the aboveground plant biomass. This effect should logically be at its highest during the summer months, when the plants are fully developed. However, quantitative proportion of aboveground autotrophic respiration was rarely reported, and the published studies exhibited wide variability and had relatively large uncertainties – some studies

500  
505  
510  
515



Estimated mean annual C input into soil with vegetation (residues of above- and belowground parts returned to the soil) was comparatively similar in cropland and grassland, while proportion of C input with above- and belowground litter differed – in cropland, significantly higher C input was from residues of aboveground part of plants, while in grassland even slightly higher C input was from belowground plant residues. Concerning plant residue inputs into soil, our results follow the previous finding  
520 that plant aboveground biomass tends to have a lower C/N ratio and therefore be more labile and decompose faster than their belowground counterparts (Almagro et al., 2021). At the same time, both above- and belowground biomass of arable crops had higher C/N ratio than grass which can potentially indicate slower decomposition of residues of arable crops. Thus, differences in C/N ratio of plant residues as well as proportion of residues of plant above- and belowground parts may introduce differences in response of soil microbial community through altering decomposition and consequent OC incorporation in stable  
525 soil aggregates (Almagro et al., 2021). Nevertheless, previous findings have indicated that total variation of CO<sub>2</sub> emissions from drained organic soil exceed variation between different cropping systems and thus, selection of certain arable crops has not become a viable option to reduce CO<sub>2</sub> emissions from cultivated organic soils thus far (Norberg et al., 2016).

## Conclusions

This study examined the CO<sub>2</sub> fluxes and estimated annual net CO<sub>2</sub> emissions from drained nutrient-rich organic soils (both  
530 deep organic soils and shallow highly decomposed organic soils) in cropland and grassland in the Baltic states (hemiboreal region of Europe). The intensity of both R<sub>eco</sub> and R<sub>het</sub> was strongly dependent on temperature (particularly soil temperature at 10 cm depth), while it was rather independent of water-table fluctuations and soil moisture. Although the results obtained within this study may contain slight overestimation rather than underestimation, our estimates of annual net CO<sub>2</sub> emissions both in cropland and grassland were lower than the IPCC (Hiraishi et al., 2014) emission factors for the temperate  
535 climate/vegetation zone. This highlights the need to specify emission factors for smaller, climatically and perhaps geomorphologically more uniform regions than the very wide regions for which the current emission factors are available. Mean annual net CO<sub>2</sub> emissions from pooled data recorded in our study were  $4.8 \pm 0.8$  t CO<sub>2</sub>-C ha<sup>-1</sup> yr<sup>-1</sup> in cropland and  $3.8 \pm 0.7$  t CO<sub>2</sub>-C ha<sup>-1</sup> yr<sup>-1</sup> in grassland, while the mean annual net CO<sub>2</sub> emissions specifically from deep organic soil were  $4.1 \pm 0.7$  t CO<sub>2</sub>-C ha<sup>-1</sup> yr<sup>-1</sup> in cropland and  $3.2 \pm 0.6$  t CO<sub>2</sub>-C ha<sup>-1</sup> yr<sup>-1</sup> in grassland. In addition, both annual R<sub>eco</sub> and R<sub>het</sub> as well as  
540 net CO<sub>2</sub> emissions from shallow highly decomposed organic soils were of similar magnitude or even higher than from deep organic soils. This result highlights the need to estimate their emissions rather as organic soils than as mineral soils, even though they do not fulfill the current IPCC definition of organic soils (Eggleston et al., 2006). A clear advantage of our study was that we were able to include several sites where comparable measurements were carried out, which allows rigorous inter-site comparison and search for explanatory variables. However, both continuation of data acquisition including higher  
545 measurement intensity and further refinement of the first hemiboreal region-specific CO<sub>2</sub> emission factors that we here defined for national GHG inventories is recommended.



### Data availability

Data used for estimation of annual net CO<sub>2</sub> fluxes is available at DOI: 10.5281/zenodo.13234237. Additional data can be provided by the corresponding authors upon request.

### 550 Author contribution

Conceptualization: AL, RL, JJ, KS; Methodology: KS, JJ, AL, IO and KA; Formal analysis: ABā, ABu; Investigation: ABu, DČ, AK, MM, IO, GRO, MKS, TS, HV, EV; Resources: AL, KS, KA; Writing - Original Draft: ABā; Writing - Review & Editing: all authors; Visualization: ABā; Supervision: RL, JJ, KS, AL, KA, IL; Project administration: IL; Funding acquisition: AL, KS, RL, JJ, KA, IL.

### 555 Competing interests

The authors declare that they have no conflict of interest.

### Acknowledgements

The research was conducted within the framework of the project “Demonstration of climate change mitigation potential of nutrients-rich organic soils in the Baltic States and Finland” (LIFE OrgBalt, LIFE18 CCM/LV/001158). Additional data was  
560 acquired within the scope of the Norwegian Financial Mechanism 2014-2021 Program “Mitigation of Climate Change, Adaptation to Climate Change, and the Environment” pre-defined project “Enhancement of sustainable soil resource management in agriculture” (2021/6e-JP/SAD (ZM Nr.2021/20)) and the European Union LIFE Programme project “Sustainable and responsible management and re-use of degraded peatlands in Latvia” (LIFE REstore, LIFE14 CCM/LV/001103). IO (Ivika Ostonen) was supported by the Estonian Research Council grant PRG916. We thank all involved  
565 field work and laboratory teams for work to obtain data and technical support.

### References

- Ahti, T., Hämet-Ahti, L., and Jalas J.: Vegetation zones and their sections in northwestern Europe, *Ann Bot Fenn*, 5, 169–211, <https://www.jstor.org/stable/23724233>, 1968.
- Alm, J., Shurpali, N. J., Minkinen, K., Aro, L., Hytönen, J., Laurila, T., Lohila, A., Maljanen, M., Martikainen, P. J.,  
570 Mäkiranta, P., Penttilä, T., Saarnio, S., Silvan, N., Tuittila, E.-S., and Laine, J.: Emission factors and their uncertainty for the exchange of CO<sub>2</sub>, CH<sub>4</sub> and N<sub>2</sub>O in Finnish managed peatlands, *Boreal Environ Res*, 12, 191–209, 2007.



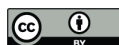

- Almagro, M., Ruiz-Navarro, A., Díaz-Pereira, E., Albaladejo, J., and Martínez-Mena, M.: Plant residue chemical quality modulates the soil microbial response related to decomposition and soil organic carbon and nitrogen stabilization in a rainfed Mediterranean agroecosystem, *Soil Biol Biochem*, 156, 108198, <https://doi.org/10.1016/j.soilbio.2021.108198>, 2021.
- 575 Bader, C., Müller, M., Schulin, R., and Leifeld, J.: Amount and stability of recent and aged plant residues in degrading peatland soils, *Soil Biol Biochem*, 109, 167–175, <https://doi.org/10.1016/j.soilbio.2017.01.029>, 2017.
- Bader, C., Müller, M., Schulin, R., and Leifeld, J.: Peat decomposability in managed organic soils in relation to land use, organic matter composition and temperature, *Biogeosciences*, 15, 703–719, <https://doi.org/10.5194/bg-15-703-2018>, 2018.
- Berglund, Ö., Berglund, K., and Klemedtsson, L.: Plant-derived CO<sub>2</sub> flux from cultivated peat soils. *Acta Agr Scand B – S P*, 580 61, 508–513, doi:10.1080/09064710.2010.51021, 2011.
- Berglund, Ö., Kätterer, T., and Meurer, K.H.E.: Emissions of CO<sub>2</sub>, N<sub>2</sub>O and CH<sub>4</sub> from cultivated and set aside drained peatland in Central Sweden, *Front Environ Sci*, 9, 630721, <https://doi.org/10.3389/fenvs.2021.630721>, 2021.
- Climate Change Knowledge Portal: <https://climateknowledgeportal.worldbank.org/country/lithuania/climate-data-historical>, last access: 7 July 2024.
- 585 Couwenberg, J.: Greenhouse gas emissions from managed peat soils: is the IPCC reporting guidance realistic? *Mires Peat*, 8, 1–10, 2011.
- Eggleston, H. S., Buendia, L., Miwa, K., Ngara, T., and Tanabe, K. (Eds.): 2006 IPCC Guidelines for National Greenhouse Gas Inventories, Prepared by the 685 National Greenhouse Gas Inventories Programme, IGES, Japan, 2006.
- Eickenscheidt, T., Heinichen, J., and Drösler, M.: The greenhouse gas balance of a drained fen peatland is mainly controlled 590 by land-use rather than soil organic carbon content, *Biogeosciences*, 12, 5161–5184, <https://doi.org/10.5194/bg-12-5161-2015>, 2015.
- Elsgaard, L., Gorres, C.-M., Hoffmann, C. C., Blicher-Mathiesen, G., Schelde, K., and Petersen, S. O.: Net ecosystem exchange of CO<sub>2</sub> and carbon balance for eight temperate organic soils under agricultural management. *Agric Ecosyst Environ* 162, 52–67. <https://doi.org/10.1016/j.agee.2012.09.001>, 2012.
- 595 Estonia's National GHG inventory, 2023: <https://unfccc.int/ghg-inventories-annex-i-parties/2023>, last access: 22 July 2024.
- European Environment Agency: Annual European Union greenhouse gas inventory 1990–2021 and inventory report 2023. Submission to the UNFCCC Secretariat, European Commission, DG Climate Action, European Environment Agency, Copenhagen, Denmark, 732 pp., 2023a.
- European Environment Agency: <https://www.eea.europa.eu/publications/soil-carbon>, last access: 23 July 2024.
- 600 Evans, C. D., Peacock, M., Baird, A. J., Artz, R. R. E., Burden, A., Callaghan, N., Chapman, P. J., Cooper, H. M., Coyle, M., Craig, E., Cumming, A., Dixon, S., Gauci, V., Grayson, R. P., Helfter, C., Heppell, C. M., Holden, J., Jones, D. L., Kaduk, J., Levy, P., Matthews, R., McNamara, N. P., Misselbrook, T., Oakley, S., Page, S. E., Rayment, M., Ridley, L. M., Stanley, K. M., Williamson, J. L., Worrall, F. and Morrison, R.: Overriding water table control on managed peatland greenhouse gas emissions, *Nature*, 593, 548–552, <https://doi.org/10.1038/s41586-021-03523-1>, 2021.



- 605 Fairbairn, L., Rezanezhad, F., Gharasoo, M., Parsons, C. T., Macrae, M. L., Slowinski, S., and Van Cappellen, P.: Relationship between soil CO<sub>2</sub> fluxes and soil moisture: Anaerobic sources explain fluxes at high water content, *Geoderma*, 434, 116493, <https://doi.org/10.1016/j.geoderma.2023.116493>, 2023.  
FAO: Drained organic soils 1990–2019. Global, regional and country trends. FAOSTAT Analytical Brief Series No 4, Rome, Italy, 9 pp., 2020.
- 610 Fell, H., Roßkopf, N., Bauriegel, A., and Zeitz, J., 2016. Estimating vulnerability of agriculturally used peatlands in north-East Germany to carbon loss based on multi-temporal subsidence data analysis, *Catena*, 137, 61–69. <https://doi.org/10.1016/j.catena.2015.08.010>, 2016.  
Fetting, C.: The European Green Deal, ESDN Report, ESDN Office, Vienna, Austria, 22 pp, 2020.  
Hanson, P. J., Edwards, N. T., Garten, C. T., and Andrews, J. A.: Separating root and soil microbial contributions to soil  
615 respiration: A review of methods and observations, *Biogeochemistry*, 48, 115–146, <https://doi.org/10.1023/A:1006244819642>, 2000.  
Hiraishi, T., Krug, T., Tanabe, K., Srivastava, N., Baasansuren, J., Fukuda, M., and Troxler, T. (Eds.): 2013 Supplement to the 2006 IPCC Guidelines for National Greenhouse Gas Inventories: Wetlands, IPCC, Switzerland, 2014.  
Houghton, J. T., Ding, Y., Griggs, D. J., Nogueir, M., van der Linden, P. J., Dai, X., Maskell, K., and Johnson, C. A. (Eds.):  
620 Climate Change 2001: The scientific basis. Contribution of working group I to the third assessment report of the Intergovernmental Panel on Climate Change. Cambridge University Press, Cambridge, United Kingdom, New York, 881 pp., 2001.  
Jian, J., R., Vargas, K. J., Anderson-Teixeira, E. Stell, V., Herrmann, M., Horn, N., Kholod, J., Manzon, R., Marchesi, D., Paredes, and Bond-Lamberty, B. P.: A709 Global Database of Soil Respiration Data, Version 5.0., Oak Ridge, Tennessee,  
625 USA., <https://doi.org/doi.org/10.3334/ORNLDAAC/1827>, 2021.  
Kasimir-Klemetsson, Å., Klemetsson, L., Berglund, K., Martikainen, P. J., Silvola, J., and Oenema, O.: Green-house gas emissions from farmed organic soils: a review, *Soil Use Manage*, 13, 245–250, <https://doi.org/10.1111/j.1475-2743.1997.tb00595.x>, 1997.  
Kuzakov, Y.: Sources of CO<sub>2</sub> efflux from soil and review of partitioning methods, *Soil Biol Biochem*, 38, 425–448,  
630 <https://doi.org/10.1016/j.soilbio.2005.08.020>, 2006.  
Latvia’s National GHG inventory, 2023: <https://unfccc.int/ghg-inventories-annex-i-parties/2023>, last access: 22 July 2024.  
Latvian State Forest Research Institute “Silava”: Above and below ground biomass and carbon content in the most common farm crops in Latvia [data set], <https://doi.org/10.5281/zenodo.12820657>, 2024.  
Leiber-Sauheitl, K., Fuß, R., Voigt, C., and Freibauer, A.: High CO<sub>2</sub> fluxes from grassland on histic Gleysol along soil carbon  
635 and drainage gradients, *Biogeosciences*, 11, 749–761, <https://doi.org/10.5194/bg-11-749-2014>, 2014.  
Leifeld, J., Müller, M., and Fuhrer, J.: Peatland subsidence and carbon loss from drained temperate fens, *Soil Use Manage*, 27, 170–176, <https://doi.org/10.1111/j.1475-2743.2011.00327.x>, 2011.



- Liang, Z., Hermansen, C., Weber, P. L. Pesch, C., Greve, M. H., de Jonge, L. W., Mäenpää, M., Leifeld J., and Elsgaard L.: Underestimation of carbon dioxide emissions from organic-rich agricultural soils, *Commun Earth Environ*, 5, 286, 640 <https://doi.org/10.1038/s43247-024-01459-8>, 2024.
- Lithuania's National GHG inventory, 2023: <https://unfccc.int/ghg-inventories-annex-i-parties/2023>, last access: 22 July 2024.
- Lohila, A., Aurela, M., Tuovinen, J.-P., and Laurila, T.: Annual CO<sub>2</sub> exchange of a peat field growing spring barley or perennial forage grass, *J Geophys Res*, 109, D18116, <https://doi.org/10.1029/2004JD004715>, 2004.
- Maljanen, M., Hytönen, J., Mäkiranta, P., Alm, J., Minkkinen, K., Laine, J., and Martikainen, P. J.: Greenhouse gas emissions 645 from cultivated and abandoned organic croplands in Finland, *Boreal Env Res*, 12, 133–140, 2007.
- Maljanen, M., Martikainen, P. J., Aaltonen, H., and Silvola, J.: Short-term variation in fluxes of carbon dioxide, nitrous oxide and methane in cultivated and forested organic boreal soils, *Soil Biol Biochem*, 34, 577–584, [https://doi.org/10.1016/S0038-0717\(01\)00213-9](https://doi.org/10.1016/S0038-0717(01)00213-9), 2002.
- Maljanen, M., Sigurdsson, B. D., Gudmundsson, J., Óskarsson, H., Huttunen, J. T., and Martikainen, P. J.: Greenhouse gas 650 balances of managed peatlands in the Nordic countries – present knowledge and gaps, *Biogeosciences*, 7, 2711–2738, <https://doi.org/10.5194/bg7-2711-2010>, 2010.
- Mäkiranta, P., Laiho, R., Fritze H., Hytönen, J., Laine, J., and Minkkinen, K.: Indirect regulation of heterotrophic peat soil respiration by water level via microbial community structure and temperature sensitivity, *Soil Biol Biochem*, 41, 695–703, <https://doi.org/10.1016/j.soilbio.2009.01.004>, 2009.
- 655 Minasny, B., Malone, B. P., McBratney, A. B., Angers, D. A., Arrouays, D., Chambers, A., Chaplot, V., Chen, Z.-S., Cheng, K., Das, B. S., Field, D. J., Gimona, A., Hedley, C. B., Hong, S. Y., Mandal, B., Marchant, B. P., Martin, M., McConkey, B. G., Mulder, V. L., O'Rourke, S., Richer-de-Forges, A. C., Odeh, I., Padarian, J., Paustian, K., Pan, G., Poggio, L., Savin, I., Stolbovoy, V., Stockmann, U., Sulaeman, Y., Tsui, C.-C., Vågen, T.-G., van Wesemael, B., and Winowiecki, L.: Soil carbon 4 per mille, *Geoderma*, 292, 59–86, <https://doi.org/10.1016/j.geoderma.2017.01.002>, 2017.
- 660 Nieveen, J. P., Campbell, D. I., Schipper, L. A., and Blair I. J.: Carbon exchange of grazed pasture on a drained peat soil, *Glob Change Biol*, 11, 607–618, <https://doi.org/10.1111/j.1365-2486.2005.00929.x>, 2005.
- Norberg, L., Berglund, Ö., and Berglund, K. Seasonal CO<sub>2</sub> emission under different cropping systems on Histosols in southern Sweden, *Geoderma Regional*, 7, 338–345, <https://doi.org/10.1016/j.geodrs.2016.06.005>, 2016.
- Nykanen, H., Alm, J., Lång, K., Silvola, J., and Martikainen, P. J.: Emissions of CH<sub>4</sub>, N<sub>2</sub>O and CO<sub>2</sub> from a virgin fen and a 665 fen drained forgrassland in Finland, *J Biogeogr*, 22, 351–357, 1995.
- Oleszczuk, R., Regina, K., Szajdak, L., Höper, H., and Maryganova, V.: Impact of agricultural utilization of peat soils on the greenhouse gas balance, in: *Peatlands and climate change*. edited by: Strack, M., International Peat Society, Jyväskylä, Finland, 70–91, 2008.
- Palosuo, T., Heikkinen, J., and Regina, K.: Method for estimating soil carbon stock changes in Finnish mineral cropland and 670 grassland soils, *Carbon Management*, 6, 207–220, <https://doi.org/10.1080/17583004.2015.1131383>, 2015.



- Parmentier, F. J. W., van der Molen, M. K., de Jeu, R. A. M., Hendriks, D. M. D., and Dolman, A. J.: CO<sub>2</sub> fluxes and evaporation on a peatland in the Netherlands appear not affected by water table fluctuations, *Agr Forest Meteorol*, 149, 1201–1208, <https://doi.org/10.1016/j.agrformet.2008.11.007>, 2009.
- Phillips, C.L., Bond-Lamberty, B., Desai, A.R., Lavoie, M., Risk, D., Tang, J., Todd-Brown, K., and Vargas, R.: The value of soil respiration measurements for interpreting and modeling terrestrial carbon cycling, *Plant Soil*, 413, 1–25, <https://doi.org/10.1007/s11104-016-3084-x>, 2017.
- Pribyl, D. W.: A critical review of the conventional SOC to SOM conversion factor, *Geoderma*, 156, 75–83, <https://doi.org/10.1016/j.geoderma.2010.02.003>, 2010.
- R Core Team: <https://www.r-project.org/contributors.html>, last access: 23 July 2024.
- Reinsch, T., Loges, R., Kluß, C., and Taube, F.: Effect of grassland ploughing and reseeded on CO<sub>2</sub> emissions and soil carbon stocks, *Agriculture, Ecosystems & Environment*, 265, 374–383, <https://doi.org/10.1016/j.agee.2018.06.020>, 2018.
- Säurich, A., Tiemeyer, B., Dettmann, U., and Don, A.: How do sand addition, soil moisture and nutrient status influence greenhouse gas fluxes from drained organic soils?, *Soil Biol Biochem*, 135, 71–84, <https://doi.org/10.1016/j.soilbio.2019.04.013>, 2019b.
- Säurich, A., Tiemeyer, B., Don, A., Fiedler, S., Bechtold, M., Amelung, W., and Freibauer, A.: Drained organic soils under agriculture – The more degraded the soil the higher the specific basal respiration, *Geoderma*, 355, 113911, <https://doi.org/10.1016/j.geoderma.2019.113911>, 2019a.
- Tang, X., Du, J., Shi, Y., Lei, N., Chen, G., Cao, L., and Pei, X.: Global patterns of soil heterotrophic respiration – A meta-analysis of available dataset, *Catena*, 191, 104574, <https://doi.org/10.1016/j.catena.2020.104574>, 2020a.
- Tang, X., Pei, X., Lei, N., Luo, X., Liu, L., Shi, L., Chen, G., and Liang, J.: Global patterns of soil autotrophic respiration and its relation to climate, soil and vegetation characteristics, *Geoderma*, 369, 114339, <https://doi.org/10.1016/j.geoderma.2020.114339>, 2020b.
- Tiemeyer, B., Albiac Borraz, E., Augustin, J., Bechtold, M., Beetz, S., Beyer, C., Drösler, M., Ebli, M., Eickenscheidt, T., Fiedler, S., Förster, C., Freibauer, A., Giebels, M., Glatzel, S., Heinichen, J., Hoffmann, M., Höper, H., Jurasinski, G., Leiber-Sauheitl, K., Peichl-Brak, M., Roßkopf, N., Sommer, M., and Zeitz J.: High emissions of greenhouse gases from grasslands on peat and other organic soils, *Glob Change Biol*, 22, 4134–4149, <https://doi.org/10.1111/gcb.13303>, 2016.
- Tubiello, F. N., Biancalani, R., Salvatore, M., Rossi, S., and Conchedda, G.: A worldwide assessment of greenhouse gas emissions from drained organic soils, *Sustainability*, 8, 371, <https://doi.org/10.3390/su8040371>, 2016.
- Tubiello, F. N., Salvatore, M., Ferrara, A. F., House, J., Federici, S., Rossi, S., Biancalani, R., Golec, R. D. C., Jacobs, H., Flammini, A., Prosperi, P., Cardenas-Galindo, P., Schmidhuber, J., Sanz Sanchez, M. J., Srivastava, N., and Smith P.: The contribution of agriculture, forestry and other land use activities to global warming, 1990–2012. *Glob Change Biol*, 21, 2655–2660, <https://doi.org/10.1111/gcb.12865>, 2015.
- UNFCCC: Adoption of the Paris Agreement, the 21st Conference of the Parties, United Nations, Paris, France, 2015.



705 Wang, Y., Paul, S. M., Jocher, M., Espic, C., Alewell, C., Szidat, S., and Leifeld, J.: Soil carbon loss from drained agricultural  
peatland after coverage with mineral soil, *Sci Total Environ*, 800, 149498, <https://doi.org/10.1016/j.scitotenv.2021.149498>,  
2021.

WRB: World Reference Base for Soil Resources 2014, International soil classification system for naming soils and creating  
legends for soil maps, *World Soil Resources Reports No. 106*, FAO, Rome, Italy, 192 pp., 2015.

710 Wüst-Galley, C., Grünig, A., and Leifeld, J.: Land use-driven historical soil carbon losses in Swiss peatlands, *Landscape Ecol*,  
35, 173–187, <https://doi.org/10.1007/s10980-019-00941-5>, 2020.
